# Supplementary material
Source: publisher figshare collection journal article supplement (https://acs.figshare.com/ndownloader/files/5814786)
Supplement: Supplementary file 1 [file 5814786]

Supporting Information

REVISED

for the article

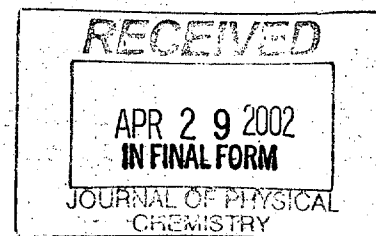

**Computational Study of the Mechanism and Product Yields  
in the Reaction Systems  $\text{C}_2\text{H}_3 + \text{CH}_3 \rightleftharpoons \text{C}_3\text{H}_6 \rightleftharpoons \text{H} + \text{C}_3\text{H}_5$   
and  $\text{C}_2\text{H}_3 + \text{CH}_3 \rightarrow \text{CH}_4 + \text{C}_2\text{H}_2$ .**

**Stanislav I. Stoliarov,<sup>a,†</sup> Vadim D. Knyazev,<sup>\*,a,b</sup> Irene R. Slagle<sup>a</sup>**

<sup>a)</sup> Research Center for Chemical Kinetics

Department of Chemistry

The Catholic University of America

Washington, DC 20064

<sup>b)</sup> National Institute of Standards and Technology

Physical and Chemical Properties Division

Gaithersburg, MD 20899

---

\* Corresponding author. E-mail: [knyazev@cua.edu](mailto:knyazev@cua.edu).

† Current address: Department of Chemical Engineering, University of Massachusetts, Amherst, MA 01003

## IS. Analysis of the Potential Energy Surface of Reaction 1. Reaction Mechanism and Product Channels.

### IS.1. Computational Methods.

Two main computational approaches were employed in this study. The first approach is the widely used Gaussian 2 (G2) method.<sup>1</sup> In this method, final geometry optimization is performed at the MP2/6-31G(d) level (although the lower HF/6-31G(d) level is used for vibrational mode analysis) and then single-point energy is obtained from a series of MP and QCISD(T) calculations<sup>2</sup> approximating a QCISD(T)/6-311+G(3df,2p) value. In the second computational approach, the B3PW91 density functional method<sup>3,4</sup> was used for geometry optimization. The choice of the B3PW91 functional was based on the conclusions of Cui and co-authors<sup>5</sup> who examined the performance of a number of density functional methods and the MP2 method on a system similar to that of reaction 1 (formation of  $\text{CH}_3 + \text{C}_2\text{H}_3^+$ ,  $\text{C}_3\text{H}_4^+ + \text{H}_2$ , and  $\text{C}_3\text{H}_5^+ + \text{H}$  in the  $\text{CH}_4 + \text{C}_2\text{H}_2^+$  reaction). These authors have found the B3PW91 method to produce the most reliable structures. This density functional method was used together with the 6-31G(d,p) Gaussian basis set. Additional polarization *p* functions on hydrogen atoms used in this basis set (as compared to the 6-31G(d) set used for geometry optimization in the G2 method) are believed to provide a better description of the H-bridged structures that represent a significant part of the potential energy surface under study. Frequency analysis and zero-point vibrational energy calculations in the second approach were performed at the same B3PW91/6-31G(d,p) level of theory. For single point energy calculations of the B3PW91 optimized structures, the QCISD(T) method with the 6-311+G(2df,2p) Gaussian basis set was employed. The QCISD(T) configuration interaction method was extensively tested on various species and shown to be very efficient in capturing most of the electron correlation energy necessary for accurate treatment of energetics.<sup>6</sup>

The two approaches (G2 and QCISD(T)/B3PW91) were chosen to provide similar high accuracy together with reasonable computational speed. Both of them were used for each structure on the potential energy surface under study in order to assess the reliability of the results. Restricted methods were used for closed-shell structures and unrestricted methods were used for radicals. The stability of self-consistent-field (SCF) solutions was tested for each optimized geometry. In cases where restricted methods generated unstable wavefunctions, unrestricted methods were employed to obtain stable SCF solutions (with the exception of G2

energies, in which case closed-shell calculations were performed for all non-radical species). All stationary points were positively identified as minimum (no imaginary frequencies) or saddle point (one imaginary frequency). Intrinsic reaction coordinate (IRC)<sup>7</sup> calculations in mass-weighted internal coordinates<sup>8</sup> were performed for each optimized saddle point structure in order to verify the connected reactants and products. All calculations were carried out using the Gaussian 98<sup>9</sup> and Gaussian 94<sup>10</sup> packages of programs.

### IS.2. Decomposition and Isomerization of Chemically Activated Propene.

Several saddle points corresponding to transformations of propene were found using the computational methods described above. Structures of these saddle points and some important intermediates are presented in Table 1S, where structures of all stable species involved in reaction channels 1a – 1g obtained in the calculations are given. Calculated energies of all individual species are listed in Table 3S (absolute energies) and Table 2 of the article (energies of transition states and products relative to the  $C_2H_3 + CH_3$  reactants). A potential energy diagram of reaction 1 obtained from the experimental thermochemical data and from the results of the calculations is presented in Figure 1 of the article. Individual channels of propene transformation are discussed below.

#### *Isomerization to cyclopropane (channel 1d)*

The optimized structure of the transition state of this reaction, TS1, is given in Table 1S. B3PW91-level IRC analysis shows that TS1 leads directly from propene to cyclopropane. IRC calculations performed at the MP2 level of theory indicate that TS1 leads from propene to a shallow minimum, a trimethylene intermediate. A low-energy transition state located at the MP2 level leads from this minimum to cyclopropane, according to the IRC analysis. However, G2 calculations performed using the MP2-optimized structures demonstrate a monotonic energy decrease along the TS1→cyclopropane path, thus indicating the absence of both the trimethylene intermediate and the trimethylene-cyclopropane transition state. The results of a recent computational study of isomerization of cyclopropane to propene<sup>11</sup> performed at the B3LYP/cc-pVDZ level of theory also indicate that there is no intermediate on the reaction path and that the reaction occurs via a saddle point almost identical in structure to TS 1 that leads directly from the reactant to the product. High spin contamination of the HF wave function of the TS1 structure

( $\langle s^2 \rangle = 0.86$ , see Table 3S.) may indicate that it is a singlet biradical (two unpaired electrons with opposite spin). However, the analysis of the molecular orbital occupation for this transition state performed by the authors of reference 11 at the TCSCF/cc-pVDZ level of theory indicates that it is a closed-shell singlet (all electrons are paired) with only some biradical character.

The energies of the TS1 transition state calculated by the G2 and QCISD(T)//B3PW91 methods differ by  $37 \text{ kJ mol}^{-1}$ . This disagreement between the results of the two approaches is most likely due to the high spin contamination of the TS 1 structure. Furue and Pacey<sup>12</sup> examined a large volume of experimental kinetic data available on the reaction of the isomerization of cyclopropane to propene. These authors recommended the high-pressure-limit activation energy value of  $276.0 \pm 2 \text{ kJ mol}^{-1}$  for this reaction. Thus, the value of the barrier height for the isomerization of propene to cyclopropane can be estimated using the experimental thermochemical data (Table 1 of the article) as  $309 \text{ kJ mol}^{-1}$ . This value coincides with the average of the G2 and QCISD(T)//B3PW91 relative energies of TS1 (Table 2 of the article).

#### *H<sub>2</sub> elimination (channels 1e, 1f, and 1g)*

Elimination of molecular hydrogen is one of the possible routes of decomposition of chemically activated propene (product channels 1e, 1f, or 1g). A scan of the potential energy surface performed at the HF/6-31G(d) and B3PW91/6-31G(d,p) levels of theory revealed no four-center H<sub>2</sub> elimination transition states. No transition state could be located for the reaction of H<sub>2</sub> elimination that would lead to the formation of cyclopropene (product channel 1g) as well. However, four different pathways of three-center H<sub>2</sub> elimination were identified. The optimized geometries of the transition states and intermediates of these reactions are presented in Table 1S.

Two of these pathways (proceeding through saddle points TS2.1 and TS2.2) are similar in structure and energy. They involve H<sub>2</sub> elimination from the terminal vinylic carbon of the propene molecule. H<sub>2</sub> elimination occurs simultaneously with a shift of the hydrogen atom from the middle to the terminal carbon atom. B3PW91 and MP2-level IRC calculations performed for these transition states show that both lead directly from propene to propyne + H<sub>2</sub>.

Two other pathways of H<sub>2</sub> elimination proceed via an H-atom shift transition state, TS2.3, that leads to the formation of the CH<sub>3</sub>CCH<sub>3</sub> intermediate, which is a spin-contaminated singlet. Three-center H<sub>2</sub> elimination from the CH<sub>3</sub>CCH<sub>3</sub> intermediate via either the TS2.4 or the

TS2.5 saddle points leads to the formation of propyne. No reaction pathways corresponding to H<sub>2</sub> elimination from the methyl group of propene could be located.

The results of the energy calculations for the species involved in the H<sub>2</sub> elimination reactions (Table 2 of the article) demonstrate an excellent agreement between the G2 and the QCISD(T)//B3PW91 methods. The potential energy profiles of the H<sub>2</sub> elimination pathways are shown in Figure 1 of the article. Although the energies of TS2.1 and TS2.2 are slightly below that of the C<sub>2</sub>H<sub>3</sub> + CH<sub>3</sub> reactants, they are 26 – 43 kJ mol<sup>-1</sup> above the energy of the C<sub>3</sub>H<sub>5</sub> + H decomposition channel. The heights of the barriers and the “tightness”<sup>13,14</sup> of the TS2.1 and TS2.2 transition states (See Table 2S in the Supplement for computed frequencies.) compared to the C<sub>3</sub>H<sub>5</sub> + H channel barrierless decomposition make these H<sub>2</sub> elimination product channels unimportant under any set of conditions. The other two H<sub>2</sub> elimination pathways proceed via the low-energy TS2.3 transition state and the CH<sub>3</sub>CCH<sub>3</sub> intermediate followed by either TS2.4 or TS2.5. The energies of the transition states TS2.4 and TS2.5 are 50 and 10 kJ mol<sup>-1</sup> above the energy of the reactants, respectively (at the G-2 level). Therefore, H<sub>2</sub> elimination reactions can not be of any importance for chemically activated propene decomposition in the C<sub>2</sub>H<sub>3</sub> + CH<sub>3</sub> system. This conclusion is supported by experimental observations: no C<sub>3</sub>H<sub>4</sub> products were detected in our earlier experimental study of reaction 1.<sup>15</sup>

#### *Decomposition of propene to C<sub>2</sub>H<sub>2</sub> and CH<sub>4</sub> products (potential routes to product channel 1c)*

In order to verify the hypothesis that the experimentally detected<sup>15-19</sup> production of acetylene in the C<sub>2</sub>H<sub>3</sub> + CH<sub>3</sub> reaction is due to a direct abstraction of a hydrogen atom from the vinyl radical by methyl radical, the potential energy surface was analyzed for the presence of reaction pathways that would lead from the chemically activated propene to the same C<sub>2</sub>H<sub>2</sub> and CH<sub>4</sub> products. Three distinct reaction routes were identified for this process. The optimized geometries of the transition states and intermediates are presented in Table 1S. These reactions proceed via the abstraction of one of three nonequivalent vinylic hydrogens of the propene molecule by the departing methyl group. In the cases of the transition states TS3.1 and TS3.2, the migration of the hydrogen atom from the remote to the adjacent carbon (with respect to the leaving methyl group) occurs in a concerted mechanism. B3PW91 and MP2-level IRC calculations indicate that the TS3.1 and the TS3.2 transition states lead directly from propene to acetylene and methane.

The transition state TS3.3 of the abstraction of H-atom from the middle carbon of the propene molecule by the departing methyl group leads to the formation of a vinylidene intermediate ( $\text{CH}_2\text{C}$ ) and methane. The vinylidene intermediate is a closed-shell structure ( $^1\text{A}_1$  is the ground state), which rapidly isomerizes to acetylene via the low ( $2 - 7 \text{ kJ mol}^{-1}$  above the energy of the  $\text{CH}_2\text{C}$ ) transition state TS3.4. According to the IRC calculations performed at the B3PW91 level of theory, the TS3.3 transition state leads directly from propene to vinylidene and methane. The results of the MP2 IRC analysis, however, suggest that a  $\text{CH}_3\text{CCH}_3$  intermediate is located on the reaction path leading from propene to TS3.3 (Figure 1 of the article).

For all the transition states and intermediates involved in the propene decomposition pathways, the relative energies computed at the G2 and the QCISD(T)/B3PW91 levels are in near perfect agreement with each other (Table 3S and Table 2 of the article). A  $18 - 21 \text{ kJ mol}^{-1}$  discrepancy between the calculated and experimental energies of the  $\text{CH}_2\text{C}$  intermediate does not necessarily indicate the failure of the computational method as it can be explained by the large uncertainty ( $\pm 16.7 \text{ kJ mol}^{-1}$ ) of the experimentally determined  $\Delta H_f^0$  of vinylidene (Table 1 of the article).

The high energies of the TS3.1, TS3.2, and TS3.3 transition states (Figure 1 of the article) indicate that the formation of acetylene and methane (product channel 1c) does not occur via the corresponding pathways of decomposition of the chemically activated propene. This supports a direct abstraction of H-atom from the vinyl radical by methyl radical as the mechanism of this product channel. However, it should be noted that the fact that no lower-energy  $\text{C}_3\text{H}_6 \rightarrow \text{C}_2\text{H}_2 + \text{CH}_4$  pathway could be found in the current work cannot serve as a rigorous proof of the absence of such a pathway.

#### *Decomposition to $\text{C}_2\text{H}_3 + \text{CH}_3$ and $\text{H} + \text{C}_3\text{H}_5$*

Decomposition of propene to  $\text{C}_2\text{H}_3 + \text{CH}_3$  (the reverse of the addition reaction) and to  $\text{H} + \text{C}_3\text{H}_5$  (allyl) are barrierless, i.e., the reverse addition processes proceed without potential energy barriers. As can be seen from the reaction energetics (Table 2 and Figure 1 of the article), decomposition to  $\text{H} + \text{C}_3\text{H}_5$  is the preferred channel, located  $53 \text{ kJ mol}^{-1}$  below the  $\text{C}_2\text{H}_3 + \text{CH}_3$  channel on the energy scale. The G2-calculated relative energies (with respect to propene) for the products of these reactions are in excellent agreement with the experimental enthalpy values (See Table 2 of the article.). The QCISD(T)//B3PW91 method underestimates the  $\text{C}_2\text{H}_3 + \text{CH}_3$  and  $\text{H} + \text{C}_3\text{H}_5$  energies by  $\approx 11 \text{ kJ mol}^{-1}$ .

Detailed studies of the potential energy surfaces of both of these decomposition routes were performed in order to obtain information necessary for the RRKM / master equation modeling. This information includes the potential energy profiles and evolution of molecular structures and vibrational frequencies along the reaction paths. A detailed description of the results is presented in section III of the article and section IIS of this Supporting Information.

Formation of other, not resonantly stabilized structural isomers of the  $C_3H_5$  radical ( $CH_3CCH_2$  and  $CH_3CHCH$ ) in the H-atom elimination from chemically activated propene is highly improbable. As demonstrated by Wang,<sup>20</sup> calculations performed at the G2//B3LYP/6-31G(d) level of theory indicate that the energies of the  $CH_3CCH_2 + H$  and  $CH_3CHCH + H$  products lie 29 and 46  $\text{kJ mol}^{-1}$  above the energy of the  $C_2H_3 + CH_3$  reactants, respectively (82 and 99  $\text{kJ mol}^{-1}$  above the energy of the H + allyl products).

### IS.3. Abstraction of Hydrogen Atom from Vinyl Radical by $CH_3$ (Reaction Channel 1c)

There are three distinct pathways of direct abstraction of H-atom from  $C_2H_3$  by  $CH_3$  corresponding to the three nonequivalent hydrogen atoms of the vinyl radical. The optimized geometries of the transition states and intermediates of these channels are presented in Table 1S. These three reaction pathways (designated as channels in this subsection) show similar behavior characterized, however, by some channel-specific features. The pathway of abstraction of the *trans* H atom (*trans* relative to H) from the  $=CH_2$  group of the vinyl radical is described first and then the features specific to the other two channels are characterized.

The potential energy profiles (zero-point vibrational energy not included) of the MP2- and B3PW91-level IRC reaction paths of the first channel are shown in Figure 1S. The results of IRC<sup>7</sup> following in mass-weighted internal coordinates<sup>8</sup> indicate that this channel of the  $C_2H_3 + CH_3 \rightarrow C_2H_2 + CH_4$  reaction proceeds via formation of a loosely bonded intermediate complex, INT4.1 (minima on the potential energy profiles), followed by the TS 4.1 transition state (maxima on the potential energy profiles) which leads to the  $C_2H_2$  and  $CH_4$  products. The formation of the intermediate complex from the  $C_2H_3 + CH_3$  reactants occurs without a barrier, a fact confirmed by relaxed scans of the distance between the carbon atom of the methyl radical and the corresponding hydrogen atom of the vinyl radical performed at the MP2 and B3PW91 levels of theory.

IRC calculations were performed using the structure of the TS4.1 saddle point as the starting geometry. In the calculations performed at the B3PW91 level, IRC following did not converge completely to the minimum of the intermediate complex INT4.1. The structure of the intermediate was obtained, in this case, by further optimization of the geometry of the last successful point on the IRC path. Thus, only an approximate position along the reaction coordinate is provided for this loosely bonded complex on the B3PW91 potential energy profile (Figure 1S). Similar problems due to incomplete geometry convergence in the vicinity of the energy profile minima were encountered in the cases of IRC analysis of TS4.2 and TS4.3.

The potential energy surfaces of the abstraction channels in reaction 1 are very shallow and affected by spin contamination, thus presenting a challenge for quantum chemical computations. The MP2 method is especially vulnerable to spin contamination.<sup>6</sup> In order to obtain more reliable information on the barrier height on the MP2-level optimized potential energy surface, an approach similar to Petersson's IRCMax method<sup>21</sup> was employed. QCISD(T) single point energy calculations with the 6-311G(d,p) medium-size Gaussian basis set were performed on the structures along the MP2/6-31G(d) IRC reaction path. The results of these calculations for the first abstraction channel are shown in Figure 1S (zero-point vibrational energy is not included). A G2 energy calculation was carried out for the structure at the top of the QCISD(T)//MP2 IRC barrier, which is shifted noticeably toward the  $C_2H_3 + CH_3$  reactants with respect to the position of the MP2-level transition state. This approach is expected to provide a more accurate upper limit of the reaction barrier height.<sup>21</sup> The energies of the TS4.1 transition state calculated by the G2//QCISD(T)//MP2 and the QCISD(T)//B3PW91 methods as well as G2//MP2/6-31G(d) and QCISD(T)//B3PW91 energies of the intermediate complex INT4.1 are listed in Table 4S. The G2-level results indicate that the energy of the TS4.1 transition state is 16 kJ mol<sup>-1</sup> below the energy of the reactants whereas QCISD(T)//B3PW91 calculations suggest that the transition state is 18 kJ mol<sup>-1</sup> above the energy of  $C_2H_3 + CH_3$ . INT4.1 is located in a deep potential energy well (42 kJ mol<sup>-1</sup> below the energy of the reactants) according to the G2 results but is essentially absent (no potential energy well) according to the QCISD(T)//B3PW91 calculations.

The potential energy profiles of the MP2-level IRC reaction path of the second channel (shallow-well intermediate INT4.2, saddle point TS4.2) and the third channel (intermediate INT4.3, saddle point TS4.3) of the hydrogen abstraction reaction are presented in Figures 2S and



3S, respectively. The second channel is that of the abstraction of the *cis* hydrogen atom (*cis* relative to H) from the  $=CH_2$  group of the vinyl radical, while the third channel corresponds to the abstraction of an H atom from the  $-CH$  group. These potential energy profiles are similar in shape to that obtained for the first channel (Figure 1S). A minor discontinuity of the MP2 energy profile of the third channel is, probably, caused by the imperfections of the IRC reaction path, which could be due to the closeness of the  $C_2H_3 + CH_3$  combination minimum energy path on the shallow potential energy surface.

At the B3PW91 level of calculations the transition states TS4.2 and TS4.3 could not be located. The results of a relaxed scan of the distance between the H-atom of the vinyl radical and the C-atom of the methyl radical (variable  $r$  in Figures 2S and 3S) performed at the B3PW91/6-31G(d,p) level indicate a barrierless reaction pathway for both the second and the third channels (Figures 2S and 3S). Both the MP2-level IRC calculations and the B3PW91-level scans demonstrate that the second channel leads directly to the formation of acetylene and methane whereas the third channel proceeds through the formation of methane and a vinylidene ( $CH_2C$ ) intermediate, which then isomerizes to acetylene (See potential energy diagram in Figure 1 of the article.).

The G2//QCISD(T)//MP2 calculations (selection of the transition state location along the MP2-level optimized reaction path on the basis of the single-point QCISD(T)/6-31G(d,p) energies with the subsequent G2-level energy calculation of the transition state energy) similar to those reported for the first abstraction pathway were performed for the second and the third pathways as well. The QCISD(T)/6-311+G(2df,2p)-level single point calculations were performed for the same structures as the G2 calculations because optimization of geometry at the B3PW91/6-31G(d,p) level did not produce any saddle points or bound intermediates. The G2//QCISD(T)//MP2 and QCISD(T)/6-311+G(2df,2p) energies of TS4.2 and TS4.3 together with the G2 and QCISD(T)/6-311+G(2df,2p) energies of INT4.2 and INT4.3 are given in Table 4S. The G2-level calculations predict lower energies compared to the QCISD(T)/6-311+G(2df,2p) values. However, the qualitative picture is the same at both levels of calculations for the second and the third abstraction channels: formation of a shallow-well intermediate followed by a barrier (below or slightly above the energy of the reactants). Accounting for the zero-point vibrational energy contributions does not produce significant changes to the potential energy profiles (Table 4S).

Although the quantitative results of the current study of the potential energy surface of the three H-atom abstraction channels are inconclusive, they do qualitatively identify two possible patterns for the reaction pathways. The reaction may proceed through a shallow-well, loosely bound intermediate complex followed by a transition state, the energy of which is below or slightly above the energy of the reactants. Alternatively, the reaction can be a simple barrierless process that does not involve any intermediates or saddle points. Both patterns can explain the experimentally observed negative temperature dependence of the rate constant of formation of  $C_2H_2$  and  $CH_4$ .<sup>15</sup>

## II. Model of the Chemically Activated Route of the $C_2H_3 + CH_3$ Reaction

### II.1. Formulation of the Master Equation.

The temporal evolution of the system can be represented by the following two differential equations (denoted as "master equation")

$$\frac{\partial g_p(E,t)}{\partial t} = \omega \int_0^\infty [P_p(E,E')g_p(E',t) - P_p(E',E)g_p(E,t)]dE' - [k_{-A}(E) + k_D(E) + k_I(E)]g_p(E,t) + k_{-I}(E)g_c(E,t) + [C_2H_3][CH_3]K_{eq}k_{-A}(E)f_p(E) \quad (Ia)$$

$$\frac{\partial g_c(E,t)}{\partial t} = \omega \int_0^\infty [P_c(E,E')g_c(E',t) - R_c(E',E)g_c(E,t)]dE' - k_{-I}(E)g_c(E,t) + k_I(E)g_p(E,t) \quad (Ib)$$

where  $g_p(E,t)$  and  $g_c(E,t)$  are the energy- and time-dependent populations of propene and cyclopropane, respectively;  $P_p(E,E')$  and  $P_c(E,E')$  are the rate coefficients of collisional energy transfer from energy  $E'$  to energy  $E$  for the corresponding species;  $k_{-A}(E)$ ,  $k_D(E)$ ,  $k_I(E)$ , and  $k_{-I}(E)$  are the microcanonical (energy-specific) rate constants of the corresponding channels in scheme II;  $f_p(E)$  is the normalized Boltzmann energy distribution in the active<sup>13,14</sup> degrees of freedom of the propene molecule; and  $\omega$  is the collision frequency with the bath gas. Here,  $K_{eq} = k_A^\infty / k_{-A}^\infty$ , where  $k_A^\infty$  and  $k_{-A}^\infty$  are the high-pressure-limit rate constants of the corresponding channels. The first term (under the integral sign) in equation Ia describes the collisional energy transfer, the second term describes the disappearance of propene molecules due to reactions, the third term is

due to the isomerization of cyclopropane to propene, and the last term  $([C_2H_3][CH_3]K_{eq}k_{-A}(E)f_p(E))^{13,14,33}$  accounts for the flux of the activated propene molecules formed in the  $C_2H_3 + CH_3$  recombination. The zero of the energy scale is chosen to be at the bottom of the potential energy well of propene (at the zero-point vibrational energy level) for the master equation and all the related formulations.

## IIS.2. Analysis of the Reaction Paths of Propene Decomposition

### *Computational Method*

Out of the two methods (MP2/6-31G(d) and B3PW91/6-31G(d,p)) used in the study of structures on the potential energy surface of the  $C_2H_3 + CH_3$  reaction (section II of the article and section IS of this Supporting Information), the B3PW91/6-31G(d,p) density functional method was selected for use in geometry optimization and calculation of frequencies along the reaction paths of decomposition of propene. The potential energy surface of decomposition of propene to vinyl and methyl radicals (reaction -A in scheme II of the article) and to H atom and allyl radical (reaction D in scheme II of the article) is highly spin-contaminated. The choice of the computational method was based on the higher reliability of the structures and frequencies produced by density functional methods on spin-contaminated potential energy surfaces.<sup>6</sup>

Intrinsic reaction coordinate<sup>7</sup> (IRC) calculations in mass-weighted internal coordinates<sup>8</sup> were performed at the B3PW91/6-31G(d,p) level of theory in order to obtain structures located along the reaction paths. The IRC calculations were carried out in the "downhill" mode starting from the structure obtained by optimization of the geometry of the decomposing molecule (propene) with a fixed, large separation of the departing fragments. The initial distance between the fragments (length of the breaking C-C bond in the case of propene decomposition to methyl and vinyl radicals, length of the breaking C-H bond in the case of H-atom elimination from propene) was chosen in such a way that the calculated energy of the structure was less than 2 kJ mol<sup>-1</sup> below the energy of the decomposition products. The frequencies of the structures located on the IRC reaction paths were calculated by projecting (onto the coordinate space tangent to the path) and diagonalizing the mass-weighted Hessian.<sup>22,23</sup> QCISD(T) single point energy calculations with the 6-311G(d,p) medium-size Gaussian basis set were performed for the B3PW91-level IRC structures in order to refine the potential energy profiles along the reaction paths. All calculations were carried out using the Gaussian 98 package of programs.<sup>9</sup>

### Potential Energy Profiles

The calculated potential energy profiles of the reaction path of the decomposition of propene to vinyl and methyl radicals are shown in Figure 4S. The upper plot presents the results of the B3PW91-level IRC calculations together with the QCISD(T) single point energies computed for the part of the B3PW91 IRC reaction path where the variationally selected transition states are likely to be located. All energy values are given relative to propene. Zero-point vibrational energies (ZPE) of the transition structures and propene are not included in the presented energy values (ZPE were included later in the calculations of the microcanonical rate constants.). The length of the breaking C-C bond of propene was chosen as a reaction coordinate. The only function of the reaction coordinate is to provide a reference to the structures on the IRC reaction path and, therefore, the choice can be arbitrary.

The results of the B3PW91 and QCISD(T) energy calculations are in good agreement with each other (Figure 4S, upper plot). In order for the potential energy profile to conform to the experimental reaction thermochemistry, the QCISD(T) energies were scaled with the ratio of the relative experimental energy of the products (with respect to propene, ZPE not included) to that obtained in the QCISD(T) calculations. The calculated and experimental energies are listed in Table 5S. The scaled QCISD(T) energy profile is shown in the lower plot of Figure 4S.

The scaled QCISD(T) energies were interpolated with a polynomial function of the form

$$E(R) = E_{\infty} [1 - \sum_{i=1}^8 a_i / R^i] \quad (\text{II})$$

where  $E_{\infty}$  is the relative experimental energy of the products,  $R$  is the reaction coordinate and  $a_i$  are the fitting coefficients. The result of the interpolation is presented as a solid line in Figure 4S (the lower plot). The optimized coefficients of the polynomial expression II are given in Table 5S.

The reaction path of the decomposition of propene to allyl radical and hydrogen atom (reaction D in scheme II of the article) was analyzed using the same approach as was used for the decomposition to vinyl and methyl radicals. The potential energy profiles of the reaction path of the H-atom elimination reaction are shown in Figure 5S. The length of the breaking C-H bond was used as a reaction coordinate for this process. The QCISD(T) energies obtained were scaled with the experimental-to-calculated ratio of the energy of the products of this reaction and fitted with expression II. The result of the fitting is presented as a solid line in the lower plot of Figure

5S. The coefficients of the polynomial expression II and calculated and experimental energy values are provided in Table 5S.

#### *Rotational Constants*

The rotational constants of the structures located on the reaction paths of the propene decomposition reactions were calculated using the B3PW91-level IRC geometries. Each structure was presented as a symmetric top described by one 1-dimensional (1D) and one 2-dimensional (2D) rotational degrees of freedom. The rotational constants of the 2D rotations were calculated as the geometric mean of the two (similar in value) rotational constants corresponding to the principal moments of inertia. The rotational constants of the internal 1D rotor (relative rotation of the methyl and vinyl fragments about the axis of the breaking C-C bond) were calculated using the formulas of Pitzer and Gwinn.<sup>24</sup>

The dependence of each rotational constant on the reaction coordinate was interpolated with a polynomial function:

$$B = \sum_{i=0}^4 b_i R^i \quad (\text{III})$$

where  $R$  is the corresponding reaction coordinate and  $b_i$  are the fitting coefficients. The obtained coefficients of the polynomial expression III are provided in Table 5S.

#### *Vibrational Frequencies*

Projected<sup>22,23</sup> B3PW91/6-31G(d,p)-level vibrational frequencies were calculated for the structures located on the IRC reaction paths of the barrierless propene decomposition channels (reactions –A and D in scheme II of the article). The vibrational modes of each structure were matched with those of the preceding and the following structure on the reaction path to ensure adequate description of the evolution of projected frequencies along the reaction coordinate. The results of these frequency calculations are presented in Figures 6S and 7S. For each reaction channel, the vibrational modes were subdivided into two categories: transitional and non-transitional. The transitional modes correspond to the relative “rocking” motion of the separating fragments and evolve into rotational degrees of freedom at the products end of the reaction path. Their frequencies approach zero as the distance between the fragments increases. There are four transitional modes (numbers 1, 2, 3, and 4 in Table 5S) in the reaction path of decomposition of propene to  $\text{C}_2\text{H}_3$  and  $\text{CH}_3$  and two in that of decomposition to  $\text{H}$  and  $\text{C}_3\text{H}_5$  (numbers 1 and 2 in Table 5S). One more transitional mode, that of the one-dimensional relative torsional rotation of

the  $\text{-C}_2\text{H}_3$  and  $\text{-CH}_3$  fragments, has very low frequencies ( $5 - 90 \text{ cm}^{-1}$  within the considered  $3.8 - 2.3 \text{ \AA}$  range of the reaction coordinate) and, therefore, was approximated by a free internal rotor for the purpose of calculation of the microcanonical rate constants.

The non-translational modes converge to the normal modes of the products as the distance between the departing fragments increases. Some of the non-translational modes showed virtually no dependence on the reaction coordinate (within the considered range) and were essentially equal to the corresponding frequencies of the products. These modes (not shown in Figures 6S and 7S) were considered as conserved.

The dependence of the frequency of each non-conserved vibrational mode on the reaction coordinate was fitted with the same type of polynomial function as was used for the interpolation of the rotational constants (expression V). The results of the frequency interpolations are shown as solid lines in Figures 6S and 7S. A correspondence was established between the non-translational vibrational modes and the corresponding normal modes of the products to which they converge at infinite separation of the fragments. The coefficients of the polynomial representation of each non-translational mode were scaled with the ratio of the experimental to calculated frequencies of the corresponding vibrational mode of the products. The scaled coefficients, together with the corresponding experimental and calculated frequencies of the products, and the unscaled coefficients of the polynomial representation of the translational modes are provided in Table 5S. Mode assignment of the experimental frequencies of the allyl radical necessary for matching of the experimental and calculated frequencies was taken from reference 25.

The scaling procedure was performed in order to reduce errors in the calculated frequencies and to ensure that the calculated potential energy along the reaction paths, with ZPE included, converges to the experimental energy of the products in the limit of infinite separation of the fragments. For the same reason, the conserved non-translational vibrational modes were assigned the experimental frequencies of the corresponding modes of the products (Table 5S). The experimental frequencies of the products were used in the scaling procedure rather than the experimental frequencies of the reactant because it was anticipated that the transition states selected by the variational approach will be closer to products (in terms of structure).

### IIS.3. Microcanonical Rate Constants

#### *Details of calculations and relevant formulas*

The RRKM method applied to such a reaction model results in the following expression for the microcanonical rate constants:

$$k(E, J) = \frac{W^\ddagger(E + E_{rot})}{h\rho(E)} \equiv \frac{\int_0^{E+E_{rot}} \rho^\ddagger(E') dE'}{h\rho(E)} \quad (\text{IV})$$

where

$$E_{rot} = (B - B^\ddagger)J(J+1) \quad (\text{V})$$

is the difference between the energy of adiabatic two-dimensional rotation of the propene molecule and that of the transition state. Here,  $J$  is the quantum number of the total angular momentum ( $J$  is conserved during the course of reaction.);  $W^\ddagger(E)$  is the sum of states of the active degrees of freedom of the transition state at energy  $E$ ;  $\rho(E)$  and  $\rho^\ddagger(E)$  are the densities of states of active degrees of freedom of the reacting molecule and transition state, respectively;  $B$  and  $B^\ddagger$  are the rotational constants of the adiabatic rotations in the same species; and  $h$  is the Planck constant.

The  $k_{-A}(E, J)$  values were averaged over the Boltzmann rotational distribution of propene using the formula

$$k_{-A}(E, T) = \sum_{J=0}^{\infty} k_{-A}(E, J)(2J+1) \exp\left(-\frac{BJ(J+1)}{k_B T}\right) \quad (\text{VI})$$

where  $B$  is the rotational constant of the two-dimensional adiabatic rotation. A finite rather than the infinite sum in expression VI was used in numerical computation. The upper limit of summation (maximum  $J$  number) was chosen in such a way that an increase of this number by 30 % would produce less than a 1% change in the high-pressure-limit rate constant of the unimolecular channel calculated by the numerical integration of the  $k_{-A}(E, T)$  function over the Boltzmann distribution of active degrees of freedom of the propene molecule.

#### *Harmonic treatment of the rocking transitional modes*

At large separations of the fragments, the vibrational frequencies of the transitional

modes of both decomposition channels are low in value (Figures 6S and 7S) indicating possibly large anharmonicities of these degrees of freedom. Accurate treatment of such degrees of freedom would require a rather detailed knowledge of their potential energy surfaces, knowledge which is currently unavailable. The treatment of these "rocking" types of motion with the simple harmonic oscillator models used in this work is associated with potential errors that are not easily estimated. Several considerations, however, indicate that these errors of harmonic treatment can be expected not to be dramatic. First, these transitional anharmonic degrees of freedom affect only calculation of the sum-of-states functions of the transition states,  $W^\ddagger(E)$ . The important energy range of the  $W^\ddagger(E)$  function is significantly narrower than that of the  $\rho(E)$  function because it extends from the reaction barrier (or critical energy below which  $W^\ddagger(E)$  is zero) and up to the approximate "end" of the energy distribution of the chemically activated propene molecules formed in the  $C_2H_3 + CH_3$  recombination. Second, the  $W^\ddagger(E)$  functions are mostly affected by the low-energy part of the density-of-states functions of the individual degrees of freedom, where harmonic approximation is most adequate. This can be seen from the convolution formula for the sum-of-states function  $W_{1,2}(E) = \int_0^E W_1(E - \varepsilon) \rho_2(\varepsilon) d\varepsilon$  (see, for example, ref. <sup>13</sup>). Here,  $\rho_2(\varepsilon)$  and  $W_1(\varepsilon)$  are the density of states of the anharmonic degree of freedom under consideration and the sum of states of all other degrees of freedom in the molecule. Since  $W_1(\varepsilon)$  grows with energy at a much faster rate than the  $\rho_2(\varepsilon)$  (due to accounting for many degrees of freedom), the main contributions to the integral are provided by the low  $\varepsilon$  part of the  $0 - E$  integration interval, where  $W_1(E - \varepsilon)$  is large. Finally, application of a variational approach to the calculation of the energy-dependent rate constants partially compensates for the anharmonic behavior of these degrees of freedom: as the energy increases, the position of the transition state shifts toward the reactant (propene) side, where the frequencies of the transitional modes are higher and the harmonic model gives better representation.

### IIS.3. Contribution of Isomerization at $T > 900$ K.

In order to estimate the contribution of the isomerization channel under the conditions where the virtual component formalism had to be applied ( $T > 900$  K), the channel branching ratios were also calculated using the first computational approach (with the reversible



isomerization included, see text of the article). The calculations were performed after the parameters of the reaction model (including the parameters of the collisional energy transfer) were adjusted to reproduce the experimental data on the  $C_2H_3 + CH_3$  combination reaction. The results obtained at the pressures of 1, 1000, and 10000 Torr in the 900 – 3000 K temperature range indicate that the time-dependent rate of formation of cyclopropane decreases with time as the system approaches thermal equilibrium and never exceeds 10 % of the rate of formation of stabilized propene. The calculated branching fractions of other reaction channels also change with time, as expected, but the time-dependent rate values obtained after a short induction period ( $<10^{-5}$  s) are not sensitive to whether the reversible isomerization is included in the computational scheme. Thus, the isomerization channel can be excluded from the kinetic scheme of the  $C_2H_3 + CH_3$  combination reaction for the purpose of the application of the virtual component formalism without serious implications for the accuracy of the computed results. The main effect of this exclusion is that the calculated rates of stabilized propene formation account for the formation of both propene and cyclopropene without distinguishing between these two isomers.

## References

1. Curtiss, L. A.; Raghavachari, K.; Trucks, G. W.; Pople, J. A. *J. Chem. Phys.* **1991**, *94*, 7221.
2. Pople, J. A.; Gead-Gordon, M.; Raghavachari, K. *J. Chem. Phys.* **1987**, *87*, 5968.
3. Perdew, J. P.; Wang, Y. *Phys. Rev. B* **1992**, *34*, 13244.
4. Becke, A. D. *J. Chem. Phys.* **1992**, *97*, 9173.
5. Cui, Q.; Liu, Z.; Morokuma, K. *J. Chem. Phys.* **1998**, *109*, 56.
6. Durant, J. L. *Computational Thermochemistry: Prediction and Estimation of Molecular Thermodynamics* ACS Symposium Series: Washington, DC, 1998.
7. Fukui, K. *Acc. Chem. Res.* **1981**, *14*, 363.
8. Gonzalez, C.; Schlegel, H. B. *J. Phys. Chem.* **1990**, *94*, 5523.
9. Frisch, M. J.; Trucks, G. W.; Schlegel, H. B.; Scuseria, G. E.; Robb, M. A.; Cheeseman, J. R.; Zakrzewski, V. G.; Montgomery, J. A. Jr.; Stratmann, R. E.; Burant, J. C.; Dapprich, S.; Millam, J. M.; Daniels, A. D.; Kudin, K. N.; Strain, M. C.; Farkas, O.; Tomasi, J.; Barone, V.; Cossi, M.; Cammi, R.; Mennucci, B.; Pomelli, C.; Adamo, C.; Clifford, S.; Ochterski, J.; Petersson, G. A.; Ayala, P. Y.; Cui, Q.; Morokuma, K.; Malick, D. K.; Rabuck, A. D.; Raghavachari, K.; Foresman, J. B.; Cioslowski, J.; Ortiz, J. V.; Stefanov, B. B.; Liu, G.; Liashenko, A.; Piskorz, P.; Komaromi, I.; Gomperts, R.; Martin, R. L.; Fox, D. J.; Keith, T.; Al-Laham, M. A.; Peng, C. Y.; Nanayakkara, A.; Gonzalez, C.; Challacombe, M.; Gill, P. M. W.; Johnson, B.; Chen, W.; Wong, M. W.; Andres, J. L.; Head-Gordon, M.; Replogle, E. S.; Pople, J. A. *Gaussian 98, Revision A.3*; Gaussian, Inc.: Pittsburgh, PA, 1998.
10. Frisch, M. J.; Trucks, G. W.; Schlegel, H. B.; Gill, P. M. W.; Johnson, B. G.; Robb, M. A.; Cheeseman, J. R.; Keith, T.; Petersson, G. A.; Montgomery, J. A.; Raghavachari, K.; Al-Laham, M. A.; Zakrzewski, V. G.; Ortiz, J. V.; Foresman, J. B.; Cioslowski, J.; Stefanov, B. B.; Nanayakkara, A.; Challacombe, M.; Peng, C. Y.; Ayala, P. Y.; Chen, W.; Wong, M. W.;

- Andres, J. L.; Replogle, E. S.; Gomperts, R.; Martin, R. L.; Fox, D. J.; Binkley, J. S.; Defrees, D. J.; Baker, J.; Stewart, J. P.; Head-Gordon, M.; Gonzalez, C.; Pople, J. A. *Gaussian 94, Revision E.1*; Gaussian, Inc.: Pittsburgh, PA, 1995.
11. Dubnikova, F.; Lifshitz, A. *J. Phys. Chem.* **1998**, *102*, 3299.
12. Furue, H.; Pacey, P. D. *Can. J. Chem.* **1982**, *60*, 916.
13. Gilbert, R. G.; Smith, S. C. *Theory of Unimolecular and Recombination Reactions*; Blackwell: Oxford, 1990.
14. Robinson, P. J.; Holbrook, K. A. *Unimolecular Reactions*; Wiley-interscience: New York, 1972.
15. Stoliarov, S. I.; Knyazev, V. D.; Slagle, I. R. *J. Phys. Chem.* **2000**, *104*, 9687.
16. Fahr, A.; Laufer, A. H.; Klein, R.; Braun, W. *J. Phys. Chem.* **1991**, *95*, 3218.
17. Fahr, A.; Braun, W.; Laufer, A. H. *J. Phys. Chem.* **1993**, *97*, 1502.
18. Thorn, R. P. Jr.; Payne, W. A. Jr.; Chillier, X. D. F.; Stief, L. J.; Nesbitt, F. L.; Tardy, D. C. *Int. J. Chem. Kinet.* **2000**, *32*, 304.
19. Fahr, A.; Laufer, A. H.; Tardy, D. C. *J. Phys. Chem.* **1999**, *103*, 8433.
20. Wang, H. *Private Communication* **1999**.
21. Peterson, G. A. *Computational Thermochemistry: Prediction and Estimation of Molecular Thermodynamics* ACS Symposium Series: Washington, DC, 1998.
22. Miller, H. W.; Handy, N. C.; Adams, J. E. *J. Chem. Phys.* **1980**, *72*, 99.
23. Baboul, A. G.; Schlegel, H. B. *J. Chem. Phys.* **1997**, *107*, 9413.
24. Pitzer, K. S.; Gwinn, W. D. *J. Chem. Phys.* **1942**, *10*, 428.
25. Liu, X.; Getty, J. D.; Kelly, P. B. *J. Chem. Phys.* **1993**, *99*, 1522.
26. Chao, J.; Zwolinski, B. J. *J. Phys. Chem. Ref. Data* **1975**, *4*, 251.
27. Brupbacher, T.; Styger, C.; Vogelsanger, B.; Ozier, I.; Bauder, A. *J. Mol. Spectrosc.* **1989**, *138*, 197.
28. Ervin, K. M.; Gronert, S.; Barlow, S. E.; Gilles, M. K.; Harrison, A. G.; Bierbaum, V. M.; DePuy, C. H.; Lineberger, W. C.; Ellison, G. B. *J. Am. Chem. Soc.* **1990**, *112*, 5750.
29. Chase, M. W. Jr.; Davies, C. A.; Downey, J. R. Jr.; Frurip, D. J.; McDonald, R. A.; Syverud, A. N. *JANAF Thermochemical Tables, 3<sup>rd</sup> Ed.*; *J. Phys. Chem. Ref. Data* **1985**, *14*, (Suppl. No. 1).
30. Shimanouchi, T. *Tables of Molecular Vibrational Frequencies. Consolidated Volume I*; National Bureau of Standards: Gaithersburg, 1972.
31. Uy, D.; Davis, S.; Nesbitt, D. J. *J. Chem. Phys.* **1998**, *109*, 7793.
32. Reid, R. C.; Prausnitz, J. M.; Sherwood, T. K. *The Properties of Gases and Liquids, 3rd Ed.*; McGraw-Hill: New York, 1977.
33. Rabinovitch, B. S.; Diesen, R. W. *J. Chem. Phys.* **1959**, *30*, 735.



| Structure | Parameters | MP2/6-31G(d) | B3PW91/6-31G(d,p) |
|-----------|------------|--------------|-------------------|
| TS 2.1    | c2c1       | 1.4975       | 1.496             |
|           | h3c2       | 1.0938       | 1.0937            |
|           | h3c2c1     | 110.6389     | 110.6216          |
|           | h4c2       | 1.0943       | 1.0958            |
|           | h4c2c1     | 110.9035     | 110.9927          |
|           | h4c2c1h3   | -120.3194    | -120.3961         |
|           | h5c2       | 1.0943       | 1.0958            |
|           | h5c2c1     | 110.9035     | 110.9927          |
|           | h5c2c1h3   | 120.3194     | 120.3961          |
|           | h6c1       | 1.0944       | 1.0994            |
|           | h6c1c2     | 115.9752     | 116.6276          |
|           | h6c1c2h3   | 180.0        | 180.0             |
|           | c7c1       | 1.3329       | 1.3187            |
|           | c7c1h6     | 107.4166     | 105.8767          |
|           | c7c1h6c2   | 180.0        | 180.0             |
|           | h8c1       | 1.714        | 1.8942            |
|           | h8c7c1     | 93.0111      | 96.1049           |
|           | h8c7c1h6   | 180.0        | 180.0             |
|           | h9c7       | 1.3271       | 1.4015            |
|           | h9c7h8     | 28.0957      | 23.1193           |
|           | h9c7h8c1   | 180.0        | 180.0             |

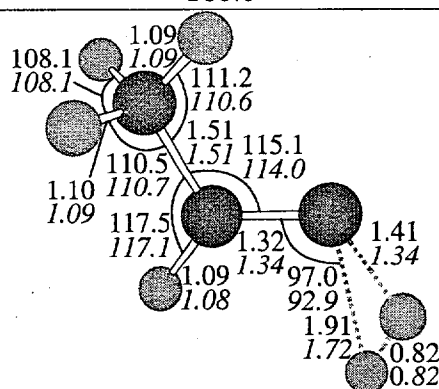

TS 2.2

| Structure | Parameters | MP2/6-31G(d) | B3PW91/6-31G(d,p) |
|-----------|------------|--------------|-------------------|
| TS 2.2    | c2c1       | 1.5072       | 1.5108            |
|           | h3c2       | 1.0932       | 1.0937            |
|           | h3c2c1     | 110.6191     | 111.2338          |
|           | h4c2       | 1.0938       | 1.0954            |
|           | h4c2c1     | 110.6829     | 110.5052          |
|           | h4c2c1h3   | -120.0958    | -120.196          |
|           | h5c2       | 1.0938       | 1.0954            |
|           | h5c2c1     | 110.6829     | 110.5052          |
|           | h5c2c1h3   | 120.0958     | 120.196           |
|           | h6c1       | 1.084        | 1.085             |
|           | h6c1c2     | 117.1256     | 117.4547          |

|        |          |          |         |
|--------|----------|----------|---------|
| TS 2.2 | h6c1c2h3 | 180.0    | 180.0   |
|        | c7c1     | 1.3377   | 1.3239  |
|        | c7c1h6   | 128.9129 | 127.481 |
|        | c7c1h6c2 | 180.0    | 180.0   |
|        | h8c1     | 1.7212   | 1.912   |
|        | h8c7c1   | 92.9397  | 96.9813 |
|        | h8c7c1h6 | 0.0      | 0.0     |
|        | h9c7     | 1.3424   | 1.4088  |
|        | h9c7h8   | 27.6464  | 22.5074 |
|        | h9c7h8c1 | 180.0    | 180.0   |

TS 2.3

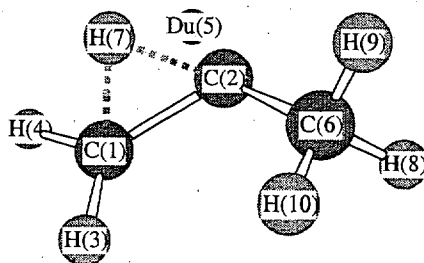

| Structure | Parameters               | MP2/6-31G(d) | B3PW91/6-31G(d,p) |
|-----------|--------------------------|--------------|-------------------|
| TS 2.3    | c2c1                     | 1.3951       | 1.3972            |
|           | h3c1                     | 1.1024       | 1.1063            |
|           | h3c1c2                   | 124.4972     | 124.8819          |
|           | h4c1                     | 1.0905       | 1.0932            |
|           | h4c1c2                   | 120.26       | 119.9824          |
|           | h4c1c2h3                 | 187.6354     | 188.9019          |
|           | [du]5c2 <sup>b</sup>     | 1.0          | 1.0               |
|           | [du]5c2c1 <sup>b</sup>   | 90.0         | 90.0              |
|           | [du]5c2c1h4 <sup>b</sup> | 0.0          | 0.0               |
|           | c6c2                     | 1.5032       | 1.4989            |
|           | c6c2[du]5 <sup>b</sup>   | 156.9665     | 155.6904          |
|           | c6c2[du]5c1 <sup>b</sup> | 170.8114     | 171.0229          |
|           | h7c2                     | 1.3208       | 1.3398            |
|           | h7c2c6                   | 113.0336     | 113.9361          |
|           | h7c2c6c1                 | 60.1391      | 60.1351           |
|           | h8c6                     | 1.0961       | 1.0987            |
|           | h8c6c2                   | 105.2675     | 105.1874          |
|           | h8c6c2h7                 | 172.1096     | 174.2061          |
|           | h9c6                     | 1.0928       | 1.095             |
|           | h9c6c2                   | 111.7734     | 111.767           |
|           | h9c6c2h8                 | 114.5301     | 113.4481          |
|           | h10c6                    | 1.1028       | 1.1053            |
|           | h10c6c2                  | 116.2925     | 117.1534          |
|           | h10c6c2h8                | -119.0108    | -119.217          |

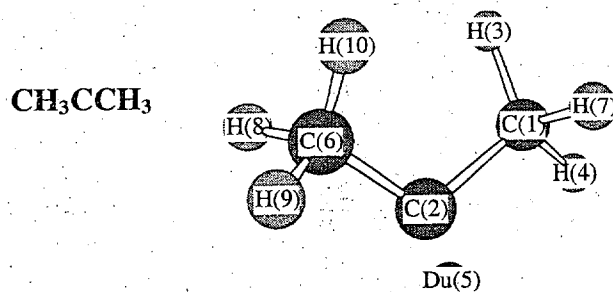

| Structure                 | Parameters               | MP2/6-31G(d) | B3PW91/6-31G(d,p) |
|---------------------------|--------------------------|--------------|-------------------|
| $\text{CH}_3\text{CCH}_3$ | c2c1                     | 1.484        | 1.4797            |
|                           | h3c1                     | 1.1          | 1.1036            |
|                           | h3c1c2                   | 113.7489     | 115.5543          |
|                           | h4c1                     | 1.0918       | 1.095             |
|                           | h4c1c2                   | 113.0579     | 113.2315          |
|                           | h4c1c2h3                 | 234.2213     | 232.1075          |
|                           | [du]5c2 <sup>b</sup>     | 1.0          | 1.0               |
|                           | [du]5c2c1 <sup>b</sup>   | 90.0         | 90.0              |
|                           | [du]5c2c1h4 <sup>b</sup> | 0.0          | 0.0               |
|                           | c6c2                     | 1.484        | 1.4797            |
|                           | c6c2[du]5 <sup>b</sup>   | 149.3509     | 145.2316          |
|                           | c6c2[du]5c1 <sup>b</sup> | 144.775      | 139.6306          |
|                           | h7c2                     | 2.0816       | 2.0679            |
|                           | h7c2c6                   | 106.8788     | 111.2248          |
|                           | h7c2c6c1                 | 31.6479      | 33.5243           |
|                           | h8c6                     | 1.1012       | 1.1045            |
|                           | h8c6c2                   | 106.3147     | 105.4013          |
|                           | h8c6c2h7                 | 113.1583     | 121.8569          |
|                           | h9c6                     | 1.0919       | 1.095             |
|                           | h9c6c2                   | 113.0573     | 113.2535          |
|                           | h9c6c2h8                 | 117.3922     | 115.5647          |
|                           | h10c6                    | 1.1          | 1.1036            |
|                           | h10c6c2                  | 113.754      | 115.5115          |
|                           | h10c6c2h8                | -116.8266    | -116.5813         |

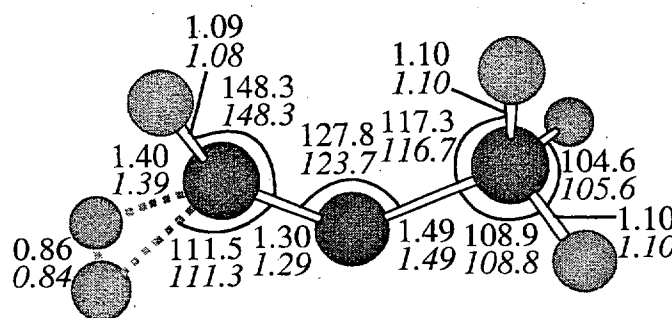

TS 2.4

| Structure | Parameters | MP2/6-31G(d) | B3PW91/6-31G(d,p) |
|-----------|------------|--------------|-------------------|
| TS 2.4    | c2c1       | 1.2924       | 1.2952            |
|           | h3c1       | 1.3897       | 1.3948            |
|           | h3c1c2     | 111.324      | 111.4883          |
|           | h4c1       | 1.3897       | 1.3948            |
|           | h4c1c2     | 111.3242     | 111.4872          |
|           | h4c1c2h3   | 322.3589     | 321.4857          |
|           | c6c2       | 1.4938       | 1.4846            |
|           | c6c2x5     | 141.9587     | 138.2347          |
|           | c6c2x5c1   | 205.8227     | 203.0361          |
|           | h7c2       | 2.2871       | 2.2901            |
|           | h7c2c6     | 109.2548     | 113.3776          |
|           | h7c2c6c1   | 0.0          | 0.0               |
|           | h8c6       | 1.0946       | 1.0972            |
|           | h8c6c2     | 108.7847     | 108.8742          |
|           | h8c6c2h7   | 122.7204     | 123.2624          |
|           | h9c6       | 1.0946       | 1.0972            |
|           | h9c6c2     | 108.785      | 108.8723          |
|           | h9c6c2h8   | 114.5562     | 113.4876          |
|           | h10c6      | 1.099        | 1.1013            |
|           | h10c6c2    | 116.6542     | 117.3319          |
|           | h10c6c2h8  | -122.7217    | -123.2572         |

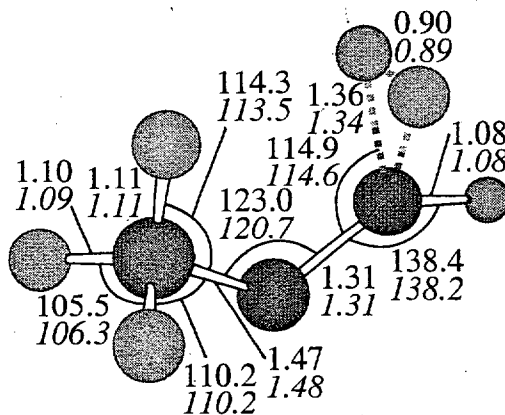

## TS 2.5

| Structure | Parameters | MP2/6-31G(d) | B3PW91/6-31G(d,p) |
|-----------|------------|--------------|-------------------|
| TS 2.5    | c2c1       | 1.3081       | 1.3109            |
|           | h3c1       | 1.338        | 1.3556            |
|           | h3c1c2     | 114.5936     | 114.8735          |
|           | h4c1       | 1.338        | 1.3556            |
|           | h4c1c2     | 114.5935     | 114.8731          |
|           | h4c1c2h3   | 316.9451     | 317.1446          |
|           | c6c2       | 1.4795       | 1.4743            |
|           | c6c2x5     | 31.3204      | 33.5286           |
|           | c6c2x5c1   | 169.1612     | 170.2105          |

|        |           |          |          |
|--------|-----------|----------|----------|
| TS 2.5 | h7c2      | 2.2313   | 2.2366   |
|        | h7c2c6    | 139.4802 | 141.6534 |
|        | h7c2c6c1  | 0.0001   | -0.0001  |
|        | h8c6      | 1.0941   | 1.0965   |
|        | h8c6c2    | 110.181  | 110.1653 |
|        | h8c6c2h7  | 121.5294 | 122.036  |
|        | h9c6      | 1.0941   | 1.0965   |
|        | h9c6c2    | 110.1809 | 110.165  |
|        | h9c6c2h8  | 116.9421 | 115.9305 |
|        | h10c6     | 1.1127   | 1.113    |
|        | h10c6c2   | 113.517  | 114.3368 |
|        | h10c6c2h8 | -121.529 | -122.035 |

TS 3.1

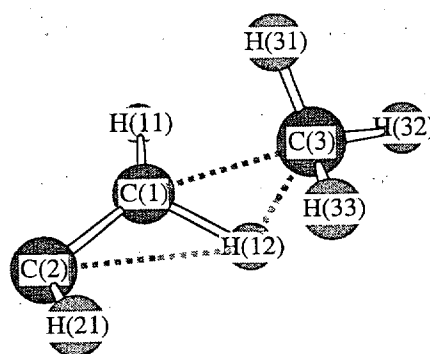

| Structure | Parameters | MP2/6-31G(d) | B3PW91/6-31G(d,p) |
|-----------|------------|--------------|-------------------|
| TS 3.1    | c2c1       | 1.3338       | 1.3376            |
|           | c3c1       | 1.8878       | 1.9144            |
|           | c3c1c2     | 123.2581     | 124.6701          |
|           | h11c1      | 1.083        | 1.0853            |
|           | h11c1c2    | 130.5726     | 130.0974          |
|           | h11c1c2c3  | -157.4807    | -159.5072         |
|           | h12c1      | 1.178        | 1.1669            |
|           | h12c1c2    | 113.9928     | 112.1045          |
|           | h12c1c2c3  | 53.8888      | 54.9023           |
|           | h21c2      | 1.0988       | 1.1003            |
|           | h21c2c1    | 114.0401     | 114.7701          |
|           | h21c2c1c3  | -17.8532     | -16.2955          |
|           | h31c3      | 1.0858       | 1.0865            |
|           | h31c3c1    | 93.9884      | 94.3076           |
|           | h31c3c1c2  | -98.0207     | -95.0753          |
|           | h32c3      | 1.0937       | 1.0929            |
|           | h32c3c1    | 118.5123     | 116.0077          |
|           | h32c3c1c2  | -213.8623    | -210.7769         |
|           | h33c3      | 1.0902       | 1.0905            |
|           | h33c3c1    | 108.4436     | 110.135           |
|           | h33c3c1c2  | 16.1085      | 19.4855           |



## TS 3.2

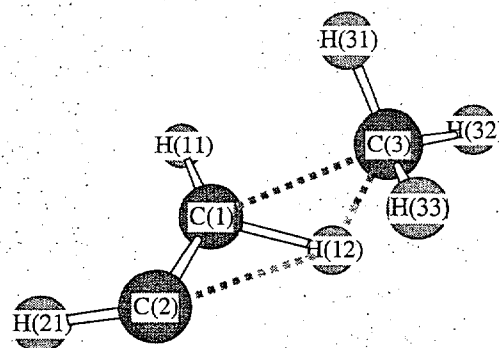

| Structure | Parameters | MP2/6-31G(d) | B3PW91/6-31G(d,p) |
|-----------|------------|--------------|-------------------|
| TS 3.2    | c2c1       | 1.3293       | 1.3316            |
|           | c3c1       | 1.8741       | 1.8872            |
|           | c3c1c2     | 111.4564     | 112.394           |
|           | h11c1      | 1.0879       | 1.09              |
|           | h11c1c2    | 142.0515     | 141.6519          |
|           | h11c1c2c3  | -156.2626    | -156.5567         |
|           | h12c1      | 1.2042       | 1.1997            |
|           | h12c1c2    | 108.9161     | 108.3673          |
|           | h12c1c2c3  | 46.3472      | 47.7109           |
|           | h21c2      | 1.1          | 1.1022            |
|           | h21c2c1    | 109.8644     | 110.4904          |
|           | h21c2c1c3  | 163.4702     | 164.3217          |
|           | h31c3      | 1.0842       | 1.0854            |
|           | h31c3c1    | 93.624       | 93.9561           |
|           | h31c3c1c2  | -107.8373    | -103.632          |
|           | h32c3      | 1.0963       | 1.0962            |
|           | h32c3c1    | 122.4272     | 120.4357          |
|           | h32c3c1c2  | -224.0268    | -219.4391         |
|           | h33c3      | 1.0878       | 1.0888            |
|           | h33c3c1    | 103.4674     | 105.3987          |
|           | h33c3c1c2  | 6.0165       | 10.085            |

## TS 3.3

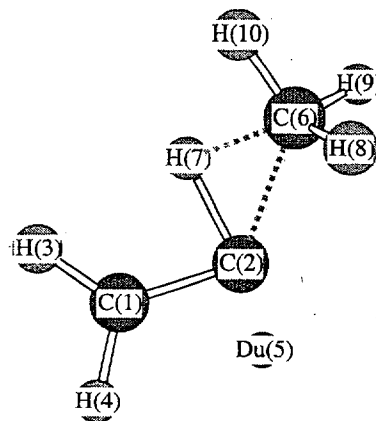

| Structure | Parameters               | MP2/6-31G(d) | B3PW91/6-31G(d,p) |
|-----------|--------------------------|--------------|-------------------|
| TS 3.3    | c2c1                     | 1.3707       | 1.3581            |
|           | h3c1                     | 1.0986       | 1.0984            |
|           | h3c1c2                   | 128.2486     | 129.8885          |
|           | h4c1                     | 1.0896       | 1.0918            |
|           | h4c1c2                   | 118.0142     | 116.6499          |
|           | h4c1c2h3                 | 177.1826     | 177.3844          |
|           | [du]5c2 <sup>b</sup>     | 1.0          | 1.0               |
|           | [du]5c2c1 <sup>b</sup>   | 90.0         | 90.0              |
|           | [du]5c2c1h4 <sup>b</sup> | 0.0          | 0.0               |
|           | c6c2                     | 1.6874       | 1.6949            |
|           | c6c2[du]5 <sup>b</sup>   | 152.4041     | 146.6956          |
|           | c6c2[du]5c1 <sup>b</sup> | 161.4657     | 167.6027          |
|           | h7c2                     | 1.2102       | 1.2313            |
|           | h7c2c6                   | 52.1647      | 49.8327           |
|           | h7c2c6c1                 | 49.5052      | 36.5817           |
|           | h8c6                     | 1.0888       | 1.0896            |
|           | h8c6c2                   | 97.6706      | 98.1496           |
|           | h8c6c2h7                 | 151.9332     | 139.7945          |
|           | h9c6                     | 1.0875       | 1.0874            |
|           | h9c6c2                   | 108.5774     | 106.0031          |
|           | h9c6c2h8                 | 113.8348     | 114.0335          |
|           | h10c6                    | 1.11         | 1.1164            |
|           | h10c6c2                  | 124.0695     | 127.3712          |
|           | h10c6c2h8                | -115.7089    | -116.8899         |

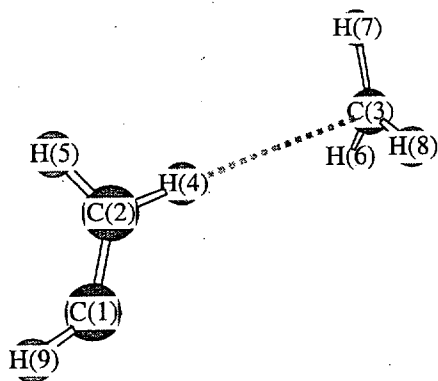

INT 4.1, MP2 structure

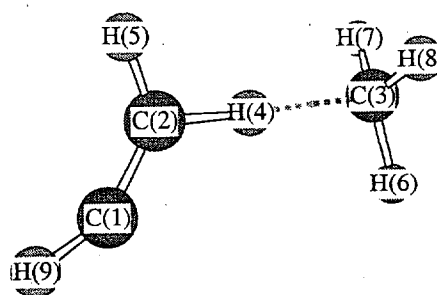

TS 4.1, MP2 structure

| Parameters | INT 4.1, MP2/6-31G(d) structure | TS 4.1, MP2/6-31G(d) structure |
|------------|---------------------------------|--------------------------------|
| c2c1       | 1.2871                          | 1.2575                         |
| c3c2       | 3.9333                          | 2.7539                         |
| c3c2c1     | 121.5074                        | 121.4303                       |
| h4c2       | 1.0868                          | 1.2107                         |
| h4c2c1     | 122.3587                        | 119.8236                       |
| h4c2c1c3   | 0.0003                          | 0.0                            |
| h5c2       | 1.0912                          | 1.0885                         |

|          |           |           |
|----------|-----------|-----------|
| h5c2h4   | 116.001   | 109.2906  |
| h5c2h4c1 | 180.0     | 180.0     |
| h6c3     | 1.0787    | 1.0843    |
| h6c3c2   | 87.2796   | 100.6198  |
| h6c3c2c1 | 60.0795   | 0.0       |
| h7c3     | 1.0787    | 1.0841    |
| h7c3c2   | 99.947    | 102.5562  |
| h7c3c2h6 | 119.9314  | 119.7281  |
| h8c3     | 1.0787    | 1.0841    |
| h8c3c2   | 87.2764   | 102.5562  |
| h8c3c2h6 | -120.1377 | -119.7281 |
| h9c1     | 1.0804    | 1.0731    |
| h9c1h5   | 110.3637  | 128.8183  |
| h9c1h5c2 | 180.0     | 180.0     |

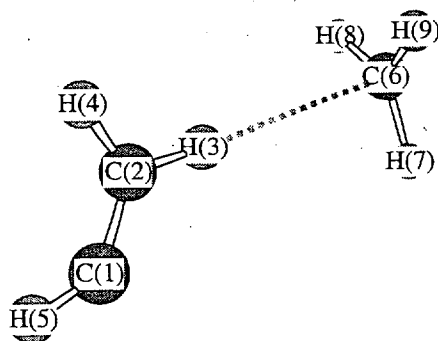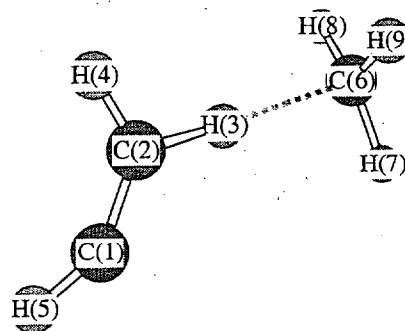

INT 4.1, B3PW91 structure

TS 4.1, B3PW91 structure

| Parameters | INT 4.1, B3PW91/6-31G(d,p)<br>structure | TS 4.1, B3PW91/6-31G(d,p)<br>structure |
|------------|-----------------------------------------|----------------------------------------|
| c2c1       | 1.309                                   | 1.289                                  |
| h3c2       | 1.0927                                  | 1.1569                                 |
| h3c2c1     | 122.2384                                | 121.2083                               |
| h4c2       | 1.0949                                  | 1.093                                  |
| h4c2h3     | 115.8122                                | 112.0268                               |
| h4c2h3c1   | 179.9996                                | 180.0094                               |
| h5c1       | 1.0827                                  | 1.0775                                 |
| h5c1h4     | 111.6559                                | 122.2437                               |
| h5c1h4c2   | 180.0008                                | 179.996                                |
| c6h3       | 2.7174                                  | 1.7631                                 |
| c6h3h4     | 145.3405                                | 143.2431                               |
| c6h3h4h5   | 180.141                                 | 180.0559                               |
| h7c6       | 1.0823                                  | 1.0847                                 |
| h7c6h3     | 88.2678                                 | 96.5256                                |
| h7c6h3c1   | -6.5438                                 | -3.7148                                |
| h8c6       | 1.0823                                  | 1.0847                                 |
| h8c6h3     | 92.799                                  | 99.577                                 |
| h8c6h3c1   | 113.3346                                | 115.9503                               |

h9c6            1.0823  
 h9c6h3        93.3195  
 h9c6h3c1      -126.4176

1.0847  
 99.7204  
 -123.4106

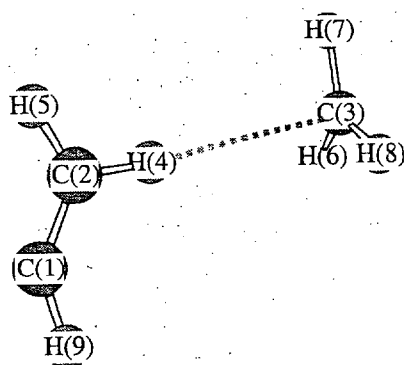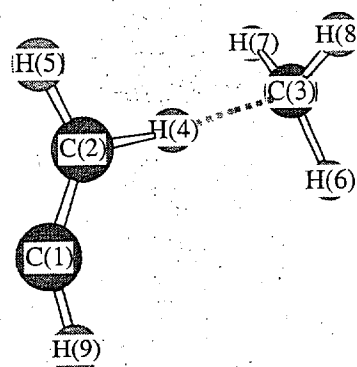

|            | INT 4.2, MP2 structure          | TS 4.2, MP2 structure          |
|------------|---------------------------------|--------------------------------|
| Parameters | INT 4.2, MP2/6-31G(d) structure | TS 4.2, MP2/6-31G(d) structure |
| c2c1       | 1.2871                          | 1.267                          |
| c3c2       | 3.865                           | 2.7807                         |
| c3c2c1     | 124.6524                        | 125.0065                       |
| h4c2       | 1.092                           | 1.1962                         |
| h4c2c1     | 122.0056                        | 121.3479                       |
| h4c2c1c3   | 0.0112                          | 0.0                            |
| h5c2       | 1.0865                          | 1.0849                         |
| h5c2h4     | 115.9888                        | 111.0537                       |
| h5c2h4c1   | 180.0                           | 180.0                          |
| h6c3       | 1.0788                          | 1.0838                         |
| h6c3c2     | 91.5951                         | 102.2999                       |
| h6c3c2c1   | 60.0489                         | 0.0                            |
| h7c3       | 1.0788                          | 1.0835                         |
| h7c3c2     | 92.4642                         | 101.037                        |
| h7c3c2h6   | 119.9989                        | 120.095                        |
| h8c3       | 1.0788                          | 1.0835                         |
| h8c3c2     | 91.5433                         | 101.037                        |
| h8c3c2h6   | -120.004                        | -120.095                       |
| h9c1       | 1.0804                          | 1.0773                         |
| h9c1h4     | 110.3822                        | 112.7786                       |
| h9c1h4c2   | 179.9999                        | 180.0                          |

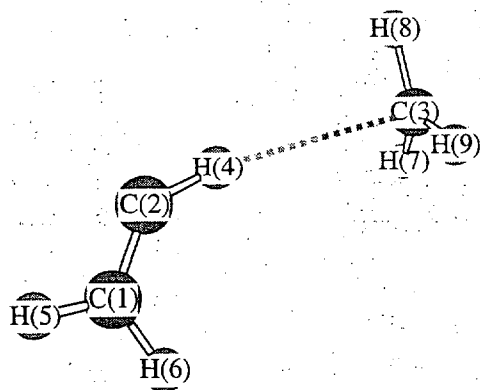

INT 4.3, MP2 structure

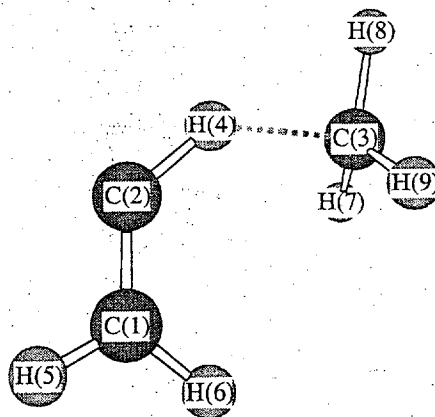

TS 4.3, MP2 structure

| Parameters <sup>a</sup> | INT 4.3, MP2/6-31G(d) structure | TS 4.3, MP2/6-31G(d) structure |
|-------------------------|---------------------------------|--------------------------------|
| c2c1                    | 1.2872                          | 1.2884                         |
| c3c2                    | 3.8157                          | 2.5416                         |
| c3c2c1                  | 129.0414                        | 105.7335                       |
| h4c2                    | 1.0815                          | 1.1717                         |
| h4c2c1                  | 137.0978                        | 129.5596                       |
| h4c2c1c3                | -0.0009                         | 0.0006                         |
| h5c1                    | 1.0864                          | 1.0867                         |
| h5c1c2                  | 122.2286                        | 119.7721                       |
| h5c1c2c3                | 180.0009                        | 179.9983                       |
| h6c1                    | 1.091                           | 1.0884                         |
| h6c1c2                  | 121.8514                        | 124.0869                       |
| h6c1c2c3                | 0.0009                          | -0.0014                        |
| h7c3                    | 1.0788                          | 1.0831                         |
| h7c3c2                  | 90.7569                         | 95.452                         |
| h7c3c2c1                | 59.9331                         | 58.3807                        |
| h8c3                    | 1.0789                          | 1.085                          |
| h8c3c2                  | 95.1682                         | 114.5367                       |
| h8c3c2h6                | 179.9911                        | 179.9171                       |
| h9c3                    | 1.0788                          | 1.0831                         |
| h9c3c2                  | 90.7601                         | 95.4825                        |
| h9c3c2h6                | -59.951                         | -58.5263                       |

<sup>a</sup> Here and throughout this table: Parameters are: x#y# - distance between atoms X# and Y# (Å); x#y#z# - angle between bonds X#Y# and Y#Z# (deg); x#y#z#w# - dihedral angle determined by atoms X#, Y#, Z#, W# (deg).

<sup>b</sup> [du]# (Du#) - dummy atom.

**Table 2S. Calculated Vibrational Frequencies ( $\text{cm}^{-1}$ ) of Reactants, Products, Transition States and Intermediates of the  $\text{C}_2\text{H}_3+\text{CH}_3$  Reaction**

| Species                    | HF/6-31G(d) Frequencies <sup>a</sup>                                                                                                  | B3PW91/6-31G(d,p) Frequencies                                                                                                      |
|----------------------------|---------------------------------------------------------------------------------------------------------------------------------------|------------------------------------------------------------------------------------------------------------------------------------|
| $\text{C}_2\text{H}_3$     | 828, 885, 959, 1196, 1408, 1635, 3279, 3374, 3431                                                                                     | 722, 826, 921, 1060, 1398, 1675, 3084, 3182, 3268                                                                                  |
| $\text{CH}_3$              | 305, 1540, 1540, 3286, 3463, 3463                                                                                                     | 467, 1414, 1414, 3139, 3326, 3326                                                                                                  |
| $\text{CH}_3\text{CHCH}_2$ | 210, 455, 641, 986, 1029, 1068, 1129, 1187, 1297, 1443, 1555, 1594, 1625, 1639, 1881, 3195, 3242, 3274, 3319, 3333, 3404              | 208, 423, 588, 937, 938, 945, 1033, 1068, 1194, 1329, 1410, 1455, 1487, 1501, 1741, 3038, 3099, 3134, 3152, 3162, 3247             |
| $\text{CH}_2\text{CHCH}_2$ | 451, 547, 572, 780, 799, 1005, 1035, 1075, 1251, 1342, 1537, 1638, 1648, 3325, 3326, 3337, 3419, 3423                                 | 425, 531, 551, 777, 802, 934, 1010, 1044, 1220, 1278, 1424, 1527, 1530, 3160, 3167, 3173, 3270, 3272                               |
| $\text{c-C}_3\text{H}_6^b$ | 804, 804, 922, 962, 962, 1191, 1191, 1224, 1268, 1304, 1330, 1330, 1616, 1616, 1680, 3309, 3309, 3323, 3383, 3383, 3405               | 739, 739, 861, 912, 912, 1062, 1064, 1083, 1154, 1214, 1214, 1238, 1478, 1479, 1534, 3152, 3152, 3160, 3233, 3233, 3253            |
| $\text{CH}_3\text{CCH}$    | 393, 393, 795, 795, 985, 1167, 1167, 1565, 1625, 1625, 2419, 3216, 3285, 3285, 3666                                                   | 349, 349, 621, 621, 960, 1053, 1053, 1417, 1483, 1483, 2251, 3049, 3124, 3124, 3499                                                |
| $\text{H}_2$               | 4646                                                                                                                                  | 4456                                                                                                                               |
| $\text{C}_2\text{H}_2$     | 794, 794, 882, 882, 2247, 3607, 3720                                                                                                  | 584, 584, 772, 772, 2087, 3443, 3544                                                                                               |
| $\text{CH}_4$              | 1487, 1487, 1487, 1702, 1702, 3200, 3305, 3305, 3305                                                                                  | 1347, 1347, 1347, 1574, 1574, 3054, 3183, 3183, 3183                                                                               |
| $\text{CH}_2\text{C}$      | 635, 941, 1398, 1843, 3326, 3410                                                                                                      | 315, 751, 1220, 1723, 3153, 3236                                                                                                   |
| $\text{CH}_3\text{CCH}_3$  | 80, 173, 365, 911, 937, 969, 1016, 1243, 1288, 1531, 1539, 1599, 1615, 1618, 1635, 3148, 3157, 3194, 3201, 3271, 3272                 | 127, 135, 341, 727, 798, 918, 970, 1112, 1219, 1358, 1360, 1434, 1435, 1489, 1492, 2965, 2970, 3029, 3031, 3110, 3112              |
| TS 1                       | 2177i, <sup>c</sup> 391, 439, 515, 554, 629, 942, 982, 987, 1268, 1311, 1364, 1525, 1589, 1646, 2060, 3327, 3338, 3351, 3423, 3469    | 1494i, <sup>c</sup> 349, 397, 531, 572, 599, 821, 917, 942, 1181, 1247, 1274, 1413, 1475, 1528, 2453, 3138, 3181, 3183, 3287, 3298 |
| TS 2.1                     | 1194i, <sup>c</sup> 149, 484, 545, 585, 781, 982, 1005, 1176, 1200, 1407, 1564, 1620, 1633, 1742, 2040, 3122, 3197, 3254, 3266, 3305  | 476i, <sup>c</sup> 152, 356, 425, 584, 601, 774, 929, 991, 1054, 1191, 1284, 1409, 1480, 1493, 1771, 3045, 3081, 3117, 3143, 3233  |
| TS 2.2                     | 1150i, <sup>c</sup> 231, 449, 467, 535, 765, 1001, 1022, 1181, 1201, 1421, 1559, 1626, 1626, 1748, 1983, 3193, 3199, 3248, 3291, 3350 | 476i, <sup>c</sup> 249, 318, 359, 546, 580, 814, 953, 1030, 1051, 1188, 1304, 1406, 1488, 1489, 1688, 3048, 3122, 3143, 3218, 3274 |

| Species | HF/6-31G(d) Frequencies <sup>a</sup>                                                                                                   | B3PW91/6-31G(d,p) Frequencies                                                                                                          |
|---------|----------------------------------------------------------------------------------------------------------------------------------------|----------------------------------------------------------------------------------------------------------------------------------------|
| TS 2.3  | 1448i, <sup>c</sup> 149, 456, 673, 982, 1120, 1144, 1173, 1284, 1457, 1538, 1555, 1624, 1637, 1693, 2347, 3135, 3196, 3232, 3265, 3338 | 1054i, <sup>c</sup> 176, 421, 604, 920, 1006, 1028, 1068, 1171, 1330, 1389, 1416, 1467, 1497, 1531, 2269, 2954, 2957, 3078, 3118, 3138 |
| TS 2.4  | 1505i, <sup>c</sup> 109, 308, 446, 604, 855, 972, 1046, 1127, 1175, 1469, 1529, 1542, 1630, 1637, 1745, 3163, 3236, 3260, 3463, 3565   | 1458i, <sup>c</sup> 35, 314, 392, 618, 830, 878, 986, 1047, 1085, 1315, 1385, 1394, 1490, 1491, 1767, 2989, 3011, 3076, 3100, 3204     |
| TS 2.5  | 1680i, <sup>c</sup> 211, 388, 526, 601, 956, 1010, 1093, 1121, 1189, 1475, 1534, 1551, 1622, 1625, 1740, 3075, 3134, 3235, 3267, 3514  | 1468i, <sup>c</sup> 222, 325, 387, 596, 878, 897, 973, 1007, 1086, 1259, 1349, 1396, 1467, 1481, 1698, 2713, 2874, 3077, 3113, 3307    |
| TS 3.1  | 1443i, <sup>c</sup> 113, 338, 596, 683, 857, 1041, 1113, 1194, 1301, 1408, 1462, 1596, 1636, 1665, 2473, 3229, 3240, 3353, 3409, 3433  | 1275i, <sup>c</sup> 120, 293, 501, 571, 803, 930, 967, 1001, 1130, 1227, 1337, 1449, 1480, 1549, 2553, 3069, 3074, 3199, 3218, 3234    |
| TS 3.2  | 1109i, <sup>c</sup> 134, 361, 608, 730, 872, 1009, 1091, 1238, 1305, 1409, 1449, 1599, 1628, 1768, 2447, 3203, 3230, 3367, 3390, 3430  | 1071i, <sup>c</sup> 146, 330, 542, 658, 802, 949, 982, 1056, 1144, 1264, 1306, 1444, 1493, 1616, 2406, 3055, 3058, 3141, 3196, 3248    |
| TS 3.3  | 1154i, <sup>c</sup> 121, 274, 461, 780, 1066, 1121, 1162, 1206, 1271, 1501, 1580, 1618, 1634, 1735, 2539, 3140, 3224, 3300, 3330, 3362 | 675i, <sup>c</sup> 153, 254, 499, 806, 875, 948, 1031, 1090, 1255, 1358, 1467, 1475, 1553, 1615, 2308, 2845, 3033, 3135, 3146, 3217    |
| TS 3.4  | 1086i, <sup>c</sup> 638, 1024, 1995, 2758, 3599                                                                                        | 907i, <sup>c</sup> 595, 924, 1869, 2575, 3386                                                                                          |
| TS 4.1  | 2436i, <sup>c</sup> 30, 184, 345, 462, 587, 631, 720, 736, 1080, 1250, 1259, 1465, 1549, 1575, 1586, 3243, 3350, 3378, 3378, 3484      | 462i, <sup>c</sup> 26, 154, 249, 449, 476, 501, 748, 761, 963, 1010, 1352, 1421, 1421, 1647, 1976, 3114, 3120, 3296, 3296, 3334        |

| Species | HF/6-31G(d) Frequencies <sup>a</sup>                                                                                                       | B3PW91/6-31G(d,p) Frequencies                                                                                          |
|---------|--------------------------------------------------------------------------------------------------------------------------------------------|------------------------------------------------------------------------------------------------------------------------|
| INT 4.1 | 5, 22, 43, 44, 76, 95, 358, 830, 885,<br>966, 1198, 1408, 1540, 1541, 1635,<br>3276, 3284, 3373, 3428, 3460, 3461                          | 7, 43, 57, 80, 131, 153, 509, 720,<br>821, 937, 1057, 1400, 1414, 1414,<br>1674, 3067, 3138, 3139, 3268,<br>3325, 3326 |
| TS 4.2  | 2303i, <sup>c</sup> 21, 179, 349, 461, 595, 651,<br>860, 874, 1124, 1211, 1231, 1458,<br>1557, 1572, 1584, 3246, 3382, 3385,<br>3389, 3466 |                                                                                                                        |
| INT 4.2 | 7, 24, 42, 48, 78, 105, 370, 831, 888,<br>963, 1198, 1408, 1541, 1541, 1635,<br>3277, 3284, 3371, 3428, 3460, 3460                         |                                                                                                                        |
| TS 4.3  | 2604i, <sup>c</sup> 20, 172, 356, 521, 643, 650,<br>978, 994, 1259, 1279, 1420, 1528,<br>1578, 1581, 1679, 3249, 3310, 3383,<br>3385, 3388 |                                                                                                                        |
| INT 4.3 | 8, 22, 43, 48, 83, 98, 383, 833, 893,<br>960, 1197, 1408, 1541, 1541, 1635,<br>3277, 3284, 3371, 3430, 3460, 3460                          |                                                                                                                        |

<sup>a</sup> Unscaled HF/6-31G(d) frequencies. <sup>b</sup> Cyclopropane. <sup>c</sup> Imaginary frequency.



**Table 3S. Energies (Hartree) of Reactants, Products, Intermediates, and Transition States of the  $C_2H_3+CH_3$  Reaction Calculated by the G2 and the QCISD(T)//B3PW91 Methods**

| Species       | G2                     |                     | QCISD(T)//B3PW91                      |                         | $\langle S^2 \rangle^c$ |
|---------------|------------------------|---------------------|---------------------------------------|-------------------------|-------------------------|
|               | G2 Energy <sup>a</sup> | HF ZPE <sup>b</sup> | QCISD(T) Energy <sup>c</sup>          | B3PW91 ZPE <sup>d</sup> |                         |
| $C_2H_3$      | -77.774395             | 0.034572            | -77.746085<br>-77.745259 <sup>f</sup> | 0.036761                | 0.93                    |
| $CH_3$        | -39.772737             | 0.027657            | -39.755779<br>-39.755807 <sup>f</sup> | 0.029812                | 0.76                    |
| $CH_3CHCH_2$  | -117.721385            | 0.076303            | -117.670355                           | 0.079939                | 0.00                    |
| $CH_2CHCH_2$  | -117.067953            | 0.062063            | -117.022251                           | 0.066280                | 0.96                    |
| H             | -0.500000              |                     | -0.499810                             |                         | 0.75                    |
| c- $C_3H_6^g$ | -117.709068            | 0.077938            | -117.657231                           | 0.081708                | 0.00                    |
| $CH_3CCH$     | -116.472823            | 0.053665            | -116.427191                           | 0.055671                | 0.00                    |
| $H_2$         | -1.175898              | 0.009540            | -1.170822                             | 0.010152                | 0.00                    |
| $C_2H_2$      | -77.212025             | 0.026293            | -77.183411                            | 0.026849                | 0.00                    |
| $CH_4$        | -40.453549             | 0.042682            | -40.431316                            | 0.045086                | 0.00                    |
| $CH_2C$       | -77.140792             | 0.023500            | -77.112245                            | 0.023688                | 0.18                    |
| $CH_3CCH_3$   | -117.608834            | 0.072741            | -117.556389                           | 0.075476                | 0.69                    |
| TS 1          | -117.601532            | 0.067351            | -117.538002                           | 0.072409                | 0.86                    |
| TS 2.1        | -117.562271            | 0.067245            | -117.510098                           | 0.068605                | 0.00                    |
| TS 2.2        | -117.560977            | 0.067316            | -117.508413                           | 0.068958                | 0.00                    |
| TS 2.3        | -117.599193            | 0.071194            | -117.547078                           | 0.074128                | 0.00                    |
| TS 2.4        | -117.532603            | 0.066882            | -117.480422                           | 0.069268                | 0.00                    |
| TS 2.5        | -117.548057            | 0.066858            | -117.496130                           | 0.068582                | 0.00                    |
| TS 3.1        | -117.534624            | 0.069447            | -117.482702                           | 0.072229                | 0.00                    |
| TS 3.2        | -117.532713            | 0.069707            | -117.480884                           | 0.072528                | 0.00                    |
| TS 3.3        | -117.543566            | 0.070026            | -117.491532                           | 0.073044                | 0.00                    |
| TS 3.4        | -77.136959             | 0.020370            | -77.107195                            | 0.021300                | 0.00                    |

<sup>a</sup> Energy calculated at the G2 <sup>1</sup> level of theory (MP2/6-31G(d)-level optimized structure). Zero-point vibrational energy is not included. 1 hartree = 2625.5 kJ mol<sup>-1</sup>.

<sup>b</sup> Zero-point vibrational energy calculated at the HF/6-31G(d) level of theory and scaled with a factor of 0.8929. The computed frequencies are presented in Table 2S.

<sup>c</sup> Energy calculated at the QCISD(T)/6-311+G(2df,2p) level of theory for B3PW91/6-31G(d,p) optimized structure. Zero-point vibrational energy is not included.

<sup>d</sup> Zero-point vibrational energy calculated at the B3PW91/6-31G(d,p) level of theory. The computed frequencies are presented in Table 2S.

<sup>e</sup>  $\langle S^2 \rangle = S(S+1)$  value at the UHF/6-31G(d) level of theory before the annihilation of the first spin contaminant (for MP2/6-31G(d) optimized structure).

<sup>f</sup> Energy calculated at the QCISD(T)/6-311+G(2df,2p) level of theory for MP2/6-31G(d) optimized structure.

<sup>g</sup> Cyclopropane.

Table 4S. Calculated Energies of Transition States and Intermediates Involved in the Abstraction of H-atom from

 $C_2H_3$  by  $CH_3$ 

| Species | G2                  |                     | QCISD(T)                     |                         | $\langle S^2 \rangle^e$ | G2 $\Delta E^f$  |              | QCISD(T) $\Delta E^f$ |                              |
|---------|---------------------|---------------------|------------------------------|-------------------------|-------------------------|------------------|--------------|-----------------------|------------------------------|
|         | Energy <sup>a</sup> | HF ZPE <sup>b</sup> | QCISD(T) Energy <sup>c</sup> | B3PW91 ZPE <sup>d</sup> |                         | ZPE not included | ZPE included | ZPE not included      | ZPE is included <sup>g</sup> |
| TS 4.1  | -117.552781         | 0.061619            | -117.495091                  | 0.066779                | 1.10                    | -14.83           | -16.43       | 17.78                 | 18.32                        |
| INT 4.1 | -117.563763         | 0.062913            | -117.502888                  | 0.067618                | 1.20                    | -43.66           | -41.87       | -2.69                 | 0.06                         |
| TS 4.2  | -117.559220         | 0.062237            | -117.499258                  |                         | 1.11                    | -31.74           | -31.72       | 4.75                  | 4.77                         |
| INT 4.2 | -117.563265         | 0.062979            | -117.502316                  |                         | 1.19                    | -42.36           | -40.39       | -3.28                 | -1.31                        |
| TS 4.3  | -117.561650         | 0.063825            | -117.501275                  |                         | 0.94                    | -38.12           | -33.93       | -0.55                 | 3.64                         |
| INT 4.3 | -117.559886         | 0.063008            | -117.502339                  |                         | 1.19                    | -33.49           | -31.44       | -3.34                 | -1.30                        |

<sup>a</sup> G2 energy in Hartree. Zero-point vibrational energy is not included. In the cases of transition states the calculations wereperformed for the structures at the top of QCISD(T)/6-311G(d,p)//MP2/6-31G(d) IRC barriers (See text for details.). <sup>b</sup> HF/6-31G(d) zero-point vibrational energy in Hartree scaled by a factor 0.8929.<sup>c</sup> QCISD(T)/6-311+G(2df,2p)//B3PW91/6-31G(d,p) energy in Hartree. Zero-point vibrational energy is not included. If the structure could not be located on the B3PW91 potential energy surface, the same geometry as in the G2 calculation was used (see text for details), in which case energy relative to reactants was obtained by subtracting the QCISD(T)/6-311+G(2df,2p)//MP2/6-31G(d) energy of  $C_2H_3 + CH_3$ . <sup>d</sup> B3PW91/6-31G(d,p) zero-point vibrational energy in Hartree. <sup>e</sup>  $\langle S^2 \rangle = S(S+1)$  value at UHF/6-31G(d) level of theory before the annihilation of the first spin contaminant (for MP2/6-31G(d) optimized structure). <sup>f</sup> Relative energy in kJ mol<sup>-1</sup> with respect to the  $C_2H_3 + CH_3$  reactants. <sup>g</sup> HF ZPE is used if B3PW91 ZPE is not available.

Table 5S. Parameters of the Model of the  $C_2H_3 + CH_3 \rightarrow Products$  Reaction and the Reaction of Propene Decomposition.Reaction Critical Energies,  $\text{kJ mol}^{-1}$  (Experimental<sup>a</sup> / Calculated<sup>b</sup>) $E_D(C_3H_6 \rightarrow C_2H_3 + CH_3) = 445.6 / 436.7$      $E_A(C_3H_6 \rightarrow H + C_3H_5) = 399.2 / 387.1$      $E_1(C_3H_6 \rightarrow \text{cyclo-}C_3H_6) = 336.3^\circ$ Polynomial Representation (Formula II) of the Potential Energy Profiles Along the Reaction Paths (Units are  $\text{kJ mol}^{-1}$  and Å) $C_3H_6 \rightarrow C_2H_3 + CH_3$ :     $a_1 = -3.0306 \times 10^3$      $a_2 = 6.5671 \times 10^4$      $a_3 = -6.0643 \times 10^5$      $a_4 = 3.0922 \times 10^6$      $a_5 = -9.3977 \times 10^6$      $a_6 = 1.7013 \times 10^7$      $a_7 = -1.6978 \times 10^7$      $a_8 = 7.2013 \times 10^6$  $C_3H_6 \rightarrow H + C_3H_5$ :     $a_1 = -5.6710 \times 10^2$      $a_2 = 1.0025 \times 10^4$      $a_3 = -7.5449 \times 10^4$      $a_4 = 3.1312 \times 10^5$      $a_5 = -7.7304 \times 10^5$      $a_6 = 1.1340 \times 10^6$      $a_7 = -9.1384 \times 10^5$      $a_8 = 3.1183 \times 10^5$ Rotational Constants<sup>d</sup> ( $\text{cm}^{-1}$ ) or their Polynomial Representations<sup>e</sup> (Formula III, units are  $\text{cm}^{-1}$  and Å), Symmetry Numbers (given in parentheses if not unity), and Torsional Barrier ( $V_0$  in  $\text{kJ mol}^{-1}$ ) $C_3H_6$ :<sup>26</sup>    (2D) 0.2902    (1D) 1.544    (1D Internal) 7.096 (3)     $V_0 = 8.355$  $C_3H_5$ :<sup>25</sup>    (2D) 0.3157 (2)    (1D) 1.829cyclo- $C_3H_6$ :<sup>27</sup>    (2D) 0.6734 (3)    (1D) 0.4211 (2) $C_2H_3$ :<sup>28</sup>    (2D) 0.9976    (1D) 7.4909 $CH_3$ :<sup>29</sup>    (2D) 9.5771 (2)    (1D) 4.788 (3) $C_3H_6 \rightarrow \text{cyclo-}C_3H_6$  Transition State: (2D) 0.2827    (1D) 1.592 $C_3H_6 \rightarrow H + C_3H_5$  Transition State:    (2D)  $b_0 = 0.2874$ ,  $b_1 = 0.004679$ ,  $b_2 = -0.0005931$ ,  $b_3 = -0.002006$ ,  $b_4 = 0.0003276$     (1D)  $b_0 = 1.756$ ,  $b_1 = -0.02919$ ,  $b_2 = -0.1430$ ,  $b_3 = 0.02824$ ,  $b_4 = -0.001469$  $C_3H_6 \rightarrow C_2H_3 + CH_3$  Transition State: (2D)  $b_0 = 0.5748$ ,  $b_1 = -0.3411$ ,  $b_2 = 0.1084$ ,  $b_3 = -0.01955$ ,  $b_4 = 0.001513$     (1D)  $b_0 = 2.355$ ,  $b_1 = 0.3091$ ,  $b_2 = -0.7117$ ,  $b_3 = 0.2560$ ,  $b_4 = -0.02856$     (1D Internal)  $b_0 = 9.811$ ,  $b_1 = 0.1885$ ,  $b_2 = -1.547$ ,  $b_3 = 0.5733$ ,  $b_4 = -0.06278$ Vibrational Frequencies ( $\text{cm}^{-1}$ ) and Degeneracies (in parentheses) $C_3H_6$ :<sup>26</sup>    3091, 3022, 2991, 2973, 2953, 2932, 1653, 1459, 1443, 1414, 1378, 1298, 1178, 1045, 990, 935, 919, 912, 575, 428,

188 (torsion)

cyclo- $C_3H_6$ :<sup>30</sup> 3103, 3082(2), 3038, 3025(2), 1479, 1438(2), 1188(3), 1126, 1070, 1029(2), 866(2), 854, 739(2) $C_3H_5$ :<sup>31</sup> 3107(2), 3054, 3021, 3019, 1487, 1464, 1390, 1247, 1182, 1071, 983, 912, 801, 738, 544, 514, 426 $C_2H_3$ :<sup>28</sup> 3265, 3190, 3115, 1670, 1445, 1185, 920, 825, 785 $CH_3$ :<sup>29</sup> 3184(2), 3002, 1383(2), 580 $C_3H_6 \rightarrow \text{cyclo-}C_3H_6$  Transition State:

527[349], 550[397], 560[531], 580[572], 599, 821, 917, 942, 1181, 1247, 1274, 1413,

1475, 1528, 2453, 3138, 3181, 3183, 3287, 3298

Table 5S (continued). Parameters of the Model of the  $C_2H_3 + CH_3 \rightarrow Products$  Reaction and the Reaction of Propene Decomposition.

| Coefficients of the Polynomial Representations of Vibrational Frequencies <sup>f</sup> (Formula V, units are $cm^{-1}$ and Å) |                                                                                                                                                         |                                                           |
|-------------------------------------------------------------------------------------------------------------------------------|---------------------------------------------------------------------------------------------------------------------------------------------------------|-----------------------------------------------------------|
| $C_3H_6 \rightarrow C_2H_3 + CH_3$ Reaction:                                                                                  |                                                                                                                                                         |                                                           |
| Vibrational mode                                                                                                              | Coefficients of Polynomial                                                                                                                              | Experimental / Calculated Frequency of Product, $cm^{-1}$ |
| 1 <sup>g</sup>                                                                                                                | $b_0 = -247.2, b_1 = 1190.0, b_2 = -804.3, b_3 = 198.9, b_4 = -17.0$<br>[ $b_0 = -514.9, b_1 = 2479.1, b_2 = -1675.6, b_3 = 414.3, b_4 = -35.5$ ]       |                                                           |
| 2 <sup>g</sup>                                                                                                                | $b_0 = -3025.4, b_1 = 5279.8, b_2 = -2931.7, b_3 = 674.8, b_4 = -56.1$<br>[ $b_0 = -6303.0, b_1 = 10999.5, b_2 = -6107.8, b_3 = 1405.9, b_4 = -116.9$ ] |                                                           |
| 3 <sup>g</sup>                                                                                                                | $b_0 = -3538.9, b_1 = 6627.4, b_2 = -3754.3, b_3 = 866.9, b_4 = -71.8$<br>[ $b_0 = -7222.2, b_1 = 13525.3, b_2 = -7661.8, b_3 = 1769.2, b_4 = -146.5$ ] |                                                           |
| 4 <sup>g</sup>                                                                                                                | $b_0 = -3549.4, b_1 = 6965.5, b_2 = -4041.1, b_3 = 949.1, b_4 = -79.6$<br>[ $b_0 = -7170.5, b_1 = 14071.8, b_2 = -8163.8, b_3 = 1917.4, b_4 = -160.9$ ] |                                                           |
| 5 <sup>h</sup>                                                                                                                | $b_0 = -16208.0, b_1 = 27325.1, b_2 = -14804.8, b_3 = 3346.4, b_4 = -272.8$                                                                             | 580 / 467 ( $CH_3$ )                                      |
| 6 <sup>h</sup>                                                                                                                | $b_0 = 4317.6, b_1 = -1989.1, b_2 = 49.8, b_3 = 132.1, b_4 = -18.9$                                                                                     | 785 / 722 ( $C_2H_3$ )                                    |
| 7 <sup>h</sup>                                                                                                                | $b_0 = -841.4, b_1 = 2716.0, b_2 = -1477.4, b_3 = 336.5, b_4 = -27.7$                                                                                   | 825 / 826 ( $C_2H_3$ )                                    |
| 8 <sup>h</sup>                                                                                                                | $b_0 = 5942.6, b_1 = -5653.2, b_2 = 2390.0, b_3 = -449.6, b_4 = 31.7$                                                                                   | 920 / 921 ( $C_2H_3$ )                                    |
| 9 <sup>h</sup>                                                                                                                | $b_0 = 17439.9, b_1 = -19470.9, b_2 = 8785.7, b_3 = -1766.4, b_4 = 133.3$                                                                               | 1185 / 1060 ( $C_2H_3$ )                                  |
| 10                                                                                                                            | Conserved                                                                                                                                               | 1445 / 1398 ( $C_2H_3$ )                                  |
| 11 <sup>h</sup>                                                                                                               | $b_0 = 2482.2, b_1 = -981.6, b_2 = 310.5, b_3 = -39.4, b_4 = 1.5$                                                                                       | 1383 / 1413 ( $CH_3$ )                                    |
| 12 <sup>h</sup>                                                                                                               | $b_0 = 2427.5, b_1 = -907.6, b_2 = 272.2, b_3 = -30.4, b_4 = 0.7$                                                                                       | 1383 / 1414 ( $CH_3$ )                                    |
| 13 <sup>h</sup>                                                                                                               | $b_0 = 2287.2, b_1 = -1681.8, b_2 = 1118.3, b_3 = -285.6, b_4 = 25.4$                                                                                   | 1670 / 1675 ( $C_2H_3$ )                                  |
| 14                                                                                                                            | conserved                                                                                                                                               | 3115 / 3085 ( $C_2H_3$ )                                  |
| 15                                                                                                                            | conserved                                                                                                                                               | 3002 / 3140 ( $CH_3$ )                                    |
| 16                                                                                                                            | conserved                                                                                                                                               | 3190 / 3183 ( $C_2H_3$ )                                  |
| 17 <sup>h</sup>                                                                                                               | $b_0 = 701.6, b_1 = 2550.3, b_2 = -952.6, b_3 = 159.4, b_4 = -10.2$                                                                                     | 3265 / 3269 ( $C_2H_3$ )                                  |
| 18                                                                                                                            | conserved                                                                                                                                               | 3184 / 3327 ( $CH_3$ )                                    |
| 19                                                                                                                            | conserved                                                                                                                                               | 3184 / 3327 ( $CH_3$ )                                    |

Table 5S (continued). Parameters of the Model of the  $C_2H_3 + CH_3 \rightarrow Products$  Reaction and the Reaction of Propene

## Decomposition.

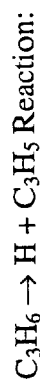

| Vibrational mode | Coefficients of Polynomial                                                                                                                                                                                                                  | Experimental / Calculated<br>Frequency of Product, $cm^{-1}$               |
|------------------|---------------------------------------------------------------------------------------------------------------------------------------------------------------------------------------------------------------------------------------------|----------------------------------------------------------------------------|
| 1 <sup>g</sup>   | $b_0 = -4055.2, b_1 = 6997.2, b_2 = -4063.4, b_3 = 997.6, b_4 = -89.4$                                                                                                                                                                      |                                                                            |
| 2 <sup>g</sup>   | $[b_0 = -7798.5, b_1 = 13456.1, b_2 = -7814.3, b_3 = 1918.5, b_4 = -171.9]$<br>$b_0 = -13863.4, b_1 = 23367.0, b_2 = -13990.2, b_3 = 3615.9, b_4 = -344.2$<br>$[b_0 = -24493.6, b_1 = 41289.7, b_2 = -24717.6, b_3 = 6388.5, b_4 = -608.2]$ | 426 / 425<br>514 / 531<br>544 / 551<br>738 / 777<br>801 / 802<br>912 / 934 |
| 3 <sup>h</sup>   | $b_0 = -122.6, b_1 = 645.4, b_2 = -276.8, b_3 = 50.4, b_4 = -3.2$                                                                                                                                                                           | 983 / 1010                                                                 |
| 4 <sup>h</sup>   | $b_0 = 24300.4, b_1 = -34218.8, b_2 = 18538.4, b_3 = -4472.1, b_4 = 404.7$                                                                                                                                                                  | 1071 / 1044                                                                |
| 5 <sup>h</sup>   | $b_0 = 31216.4, b_1 = -42650.1, b_2 = 22363.6, b_3 = -5232.5, b_4 = 460.3$                                                                                                                                                                  | 1182 / 1220                                                                |
| 6 <sup>h</sup>   | $b_0 = -8822.7, b_1 = 17114.8, b_2 = -10937.0, b_3 = 3004.1, b_4 = -301.9$                                                                                                                                                                  | 1247 / 1278                                                                |
| 7 <sup>h</sup>   | $b_0 = 11234.3, b_1 = -14707.4, b_2 = 7875.2, b_3 = -1889.4, b_4 = 170.8$                                                                                                                                                                   | 1390 / 1423                                                                |
| 8                | conserved                                                                                                                                                                                                                                   | 1464 / 1527                                                                |
| 9                | conserved                                                                                                                                                                                                                                   | 1487 / 1530                                                                |
| 10 <sup>h</sup>  | $b_0 = 12727.4, b_1 = -18027.5, b_2 = 10368.7, b_3 = -2630.9, b_4 = 248.6$                                                                                                                                                                  | 3054 / 3162                                                                |
| 11 <sup>h</sup>  | $b_0 = 2621.3, b_1 = -2029.7, b_2 = 1092.8, b_3 = -264.8, b_4 = 24.3$                                                                                                                                                                       | 3019 / 3167                                                                |
| 12 <sup>h</sup>  | $b_0 = 1713.3, b_1 = -260.3, b_2 = -57.6, b_3 = 56.2, b_4 = -8.4$                                                                                                                                                                           | 3021 / 3174                                                                |
| 13               | conserved                                                                                                                                                                                                                                   | 3107 / 3271                                                                |
| 14               | conserved                                                                                                                                                                                                                                   | 3107 / 3273                                                                |
| 15 <sup>h</sup>  | $b_0 = 12617.7, b_1 = -16330.5, b_2 = 9022.3, b_3 = -2219.2, b_4 = 204.7$                                                                                                                                                                   |                                                                            |
| 16               | conserved                                                                                                                                                                                                                                   |                                                                            |
| 17               | conserved                                                                                                                                                                                                                                   |                                                                            |
| 18               | conserved                                                                                                                                                                                                                                   |                                                                            |
| 19               | conserved                                                                                                                                                                                                                                   |                                                                            |
| 20               | conserved                                                                                                                                                                                                                                   |                                                                            |

Table S5 (continued). Parameters of the Model of the  $C_2H_3 + CH_3 \rightarrow Products$  Reaction and the Reaction of Propene

## Decomposition.

Lennard-Jones Parameters<sup>32</sup>

| Gas          | $\epsilon/k$ , K | $\sigma$ , Å |
|--------------|------------------|--------------|
| He           | 10.22            | 2.551        |
| Kr           | 178.9            | 3.655        |
| Propene      | 298.9            | 4.678        |
| Cyclopropane | 248.9            | 4.807        |

<sup>a</sup>  $\Delta E = \Delta_r H^0(\text{products}) - ZPE(\text{products}) - (\Delta_r H^0(\text{propene}) - ZPE(\text{propene}))$  calculated using experimental  $\Delta_r H^0$  at  $T = 0$  K and experimental frequencies of corresponding species.

<sup>b</sup> Relative energy of products with respect to propene calculated at the QCISD(T)/6-311G(d,p)//B3PW91/6-31G(d,p) level of theory. ZPE is not included.

<sup>c</sup> Isomerization barrier obtained from fitting of the high-pressure-limit expression of Furue and Pacey.<sup>12</sup>

<sup>d</sup> All species are presented as symmetric tops described by one 2-dimensional (2D) and one 1-dimensional (1D) external rotational constant.

<sup>e</sup> For the barrierless processes, coefficients of polynomial expression  $V$  describing the dependence of rotational constants ( $\text{cm}^{-1}$ ) on the reaction coordinate (Å) are provided.

<sup>f</sup> Coefficients of polynomial expression  $V$  describing the dependence of vibrational frequencies ( $\text{cm}^{-1}$ ) on the reaction coordinate (Å) for the barrierless propene decomposition channels.

<sup>g</sup> Coefficients of polynomial are adjusted to reproduce the high-pressure-limit rate constant (see text). Unadjusted coefficients are given in square brackets.

<sup>h</sup> Coefficients of polynomial are scaled with the corresponding ratio of experimental frequency to calculated frequency of product.

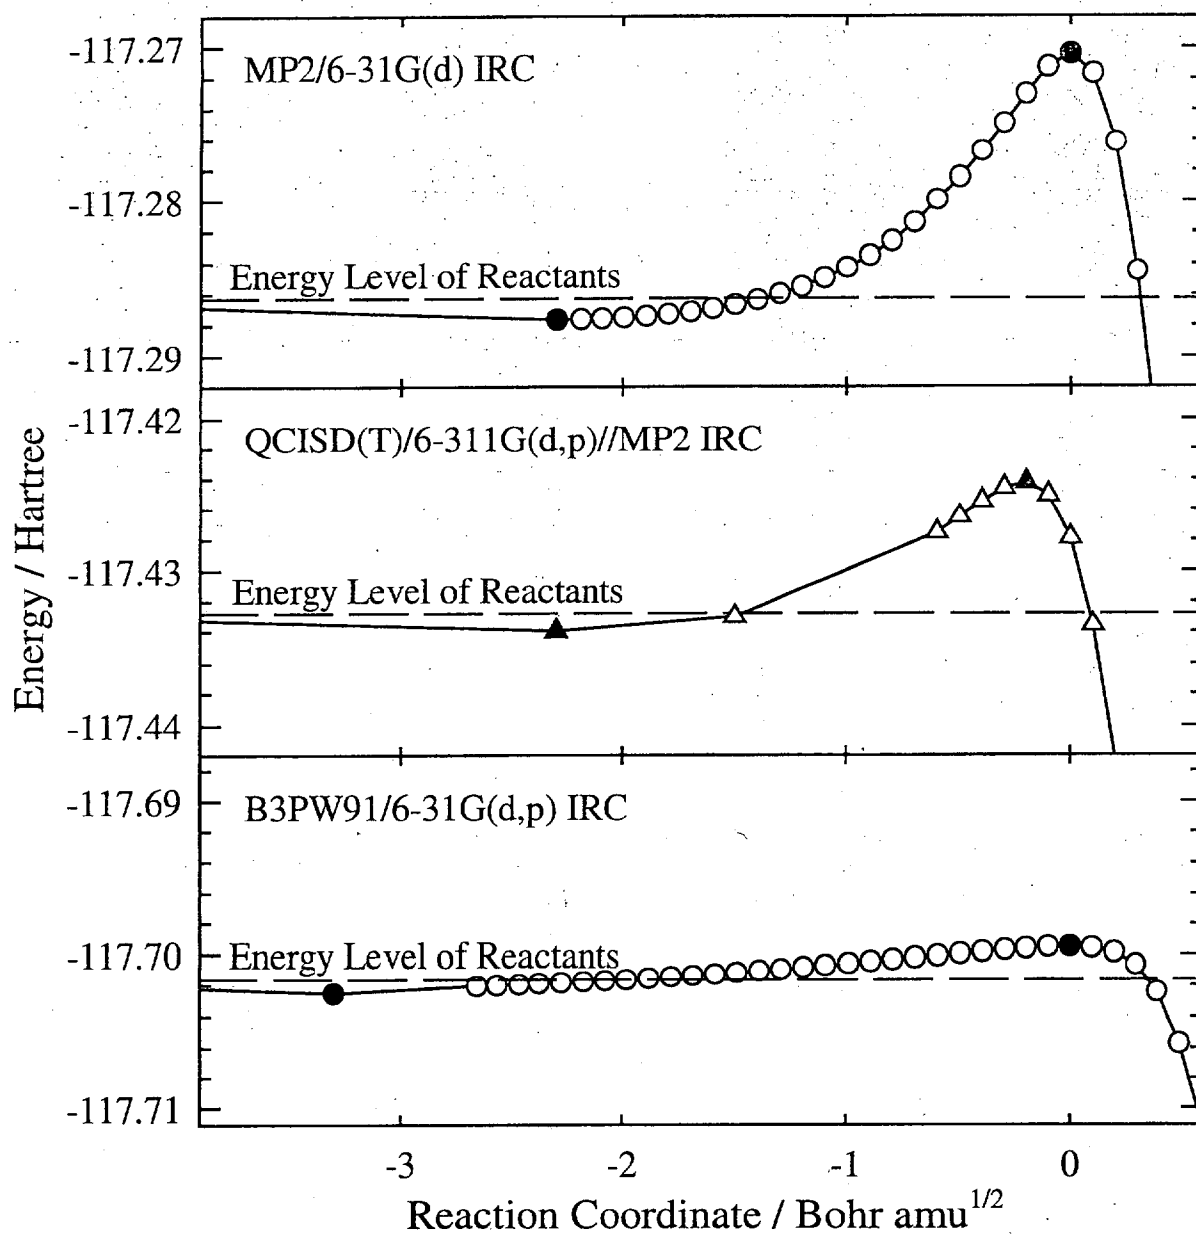

**Figure 1S.** Potential energy profiles of the first channel (abstraction of the H atom in the trans position from the =CH<sub>2</sub> group) of the  $\text{C}_2\text{H}_3 + \text{CH}_3 \rightarrow \text{C}_2\text{H}_2 + \text{CH}_4$  reaction. Filled circles and triangles signify the positions of minima and maxima of potential energy. 1 hartree = 2625.5 kJ mol<sup>-1</sup>.
